# Supplementary material
Source: publisher figshare collection journal article supplement (https://acs.figshare.com/ndownloader/files/4144471)

**Allyl *m*-Trifluoromethyldiazirine Mephobarbital: An Unusually Potent  
Enantioselective and Photoreactive Barbiturate General Anesthetic**

**Supporting Information**

Pavel Y. Savechenkov<sup>§</sup>

Xi Zhang<sup>‡</sup>

David C. Chiara<sup>†</sup>

Deirdre S. Stewart<sup>‡</sup>

Rile Ge<sup>‡</sup>

Xiaojuan Zhou<sup>‡</sup>

Douglas E. Raines<sup>‡</sup>

Jonathan B. Cohen<sup>†</sup>

Stuart A. Forman<sup>‡</sup>

Keith W. Miller<sup>‡#</sup>

Karol S. Bruzik<sup>\*§</sup>

<sup>‡</sup>Department of Anesthesia, Critical Care and Pain Medicine, Massachusetts General Hospital, 32 Fruit Street, Boston, Massachusetts 02114, <sup>#</sup>Department of Biological Chemistry and <sup>#</sup>Molecular Pharmacology, and <sup>†</sup>Department of Neurobiology, 220 Longwood Avenue, Harvard Medical School, Boston, Massachusetts 02115, and <sup>§</sup>Department of Medicinal Chemistry and Pharmacognosy, University of Illinois at Chicago, 833 S. Wood Street (M/C 781), Chicago, IL 60612-7231

Supporting information available: (1) Chiral chromatography of ( $\pm$ )-**14**, (2) HPLC of the mixture after hydrogenation of compound **15**, (3) determination of pK<sub>a</sub> value of **14**, (4) NMR data for all new synthesized compounds.

**Figure 1s.** HPLC separation of enantiomers of compound **14**. Conditions: Daicell Chiralpack AD<sup>®</sup> column, 20x200 mm eluted with isocratic 15% ethanol in hexane as an eluent at 6.5 mL/min flow rate.

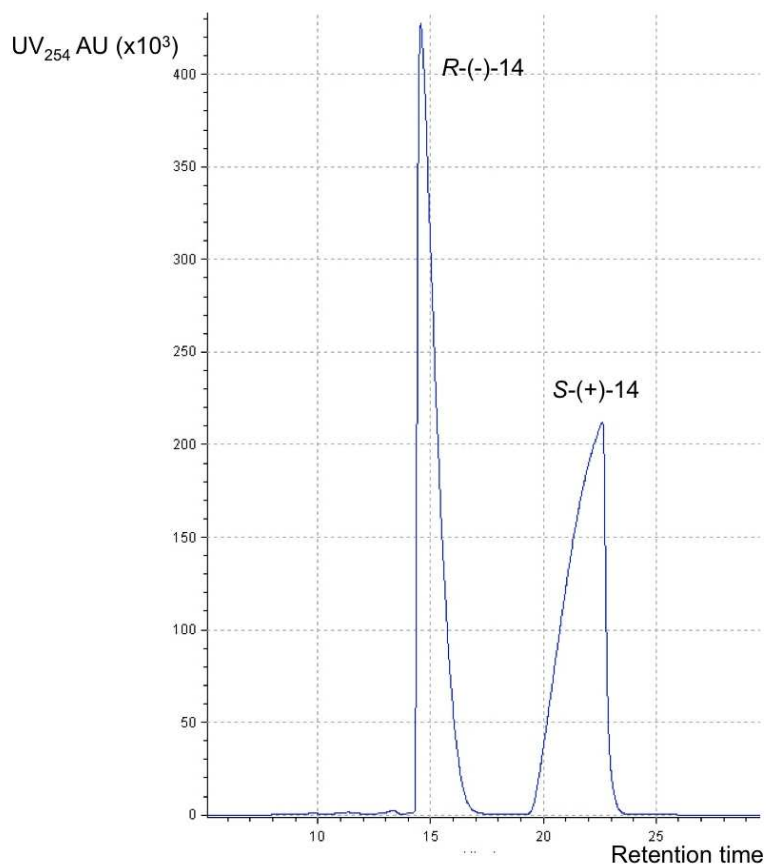

**Figure 2s.** Separation of compounds **14** and **15** by reverse phase HPLC. HPLC method: Luna 5  $\mu\text{m}$  C18 100 $\text{\AA}$  column, 150 x 3.00 mm from Phenomenex. During the first 2 minutes isocratic 0.05 M TFA was used as an eluent; starting at 2 min the gradient of 0.05 M TFA/MeOH (0-100%) was used to reach 100% at 17 min, and elution was continued with isocratic MeOH. Flow rate: 1 mL/min. Detection – UV array detector at 254 nm. (A) starting propargyl barbiturate **15**; (B) product allyl barbiturate **14**; (C) the mixture of **14** and **15**.

(A)

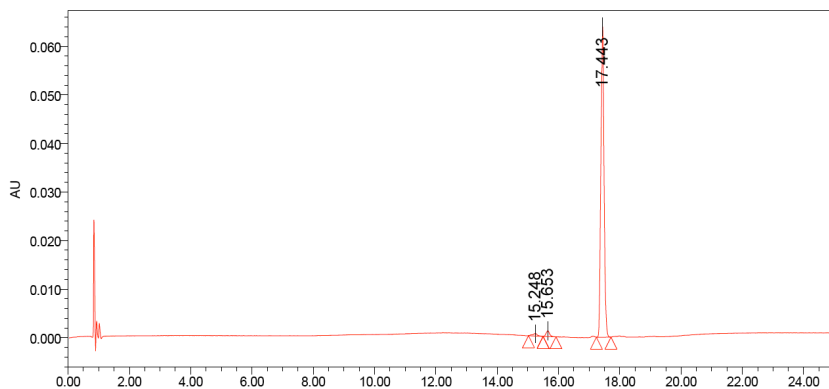

(B)

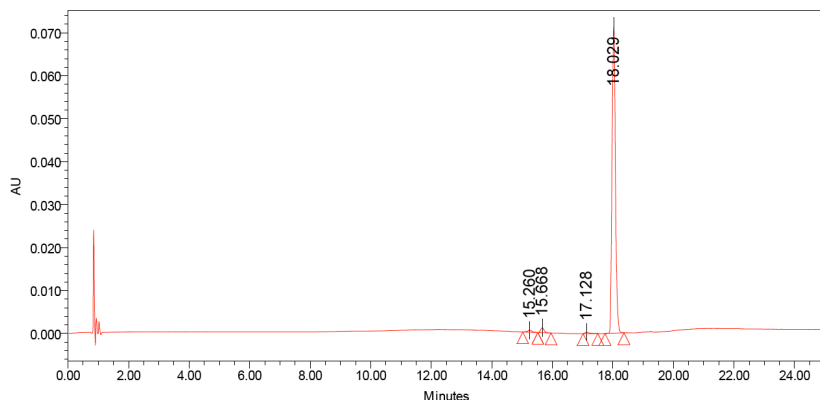

(C)

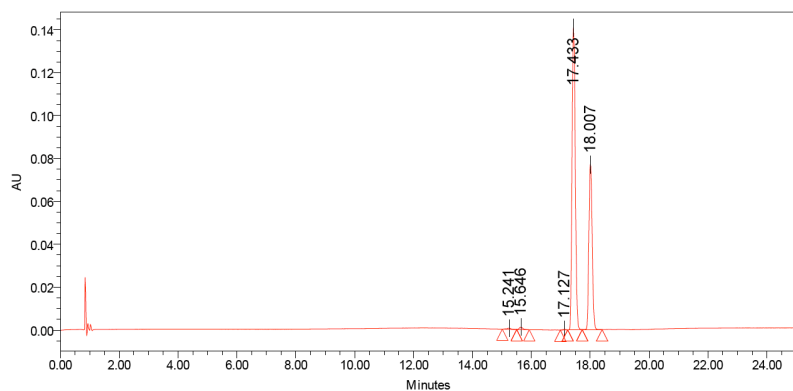

**Figure 3s.** Determination of  $pK_a$  of barbiturate ( $\pm$ )-**14**.

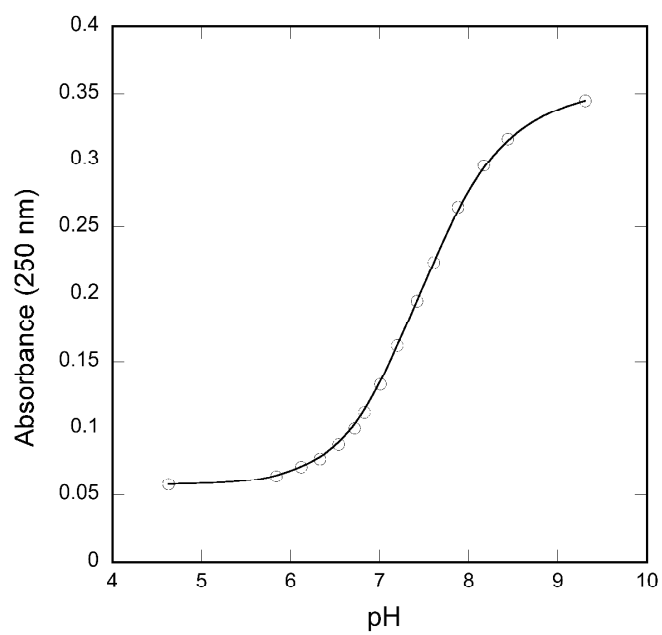

Figure 4s. NMR Data for Synthetic Intermediates and Products.

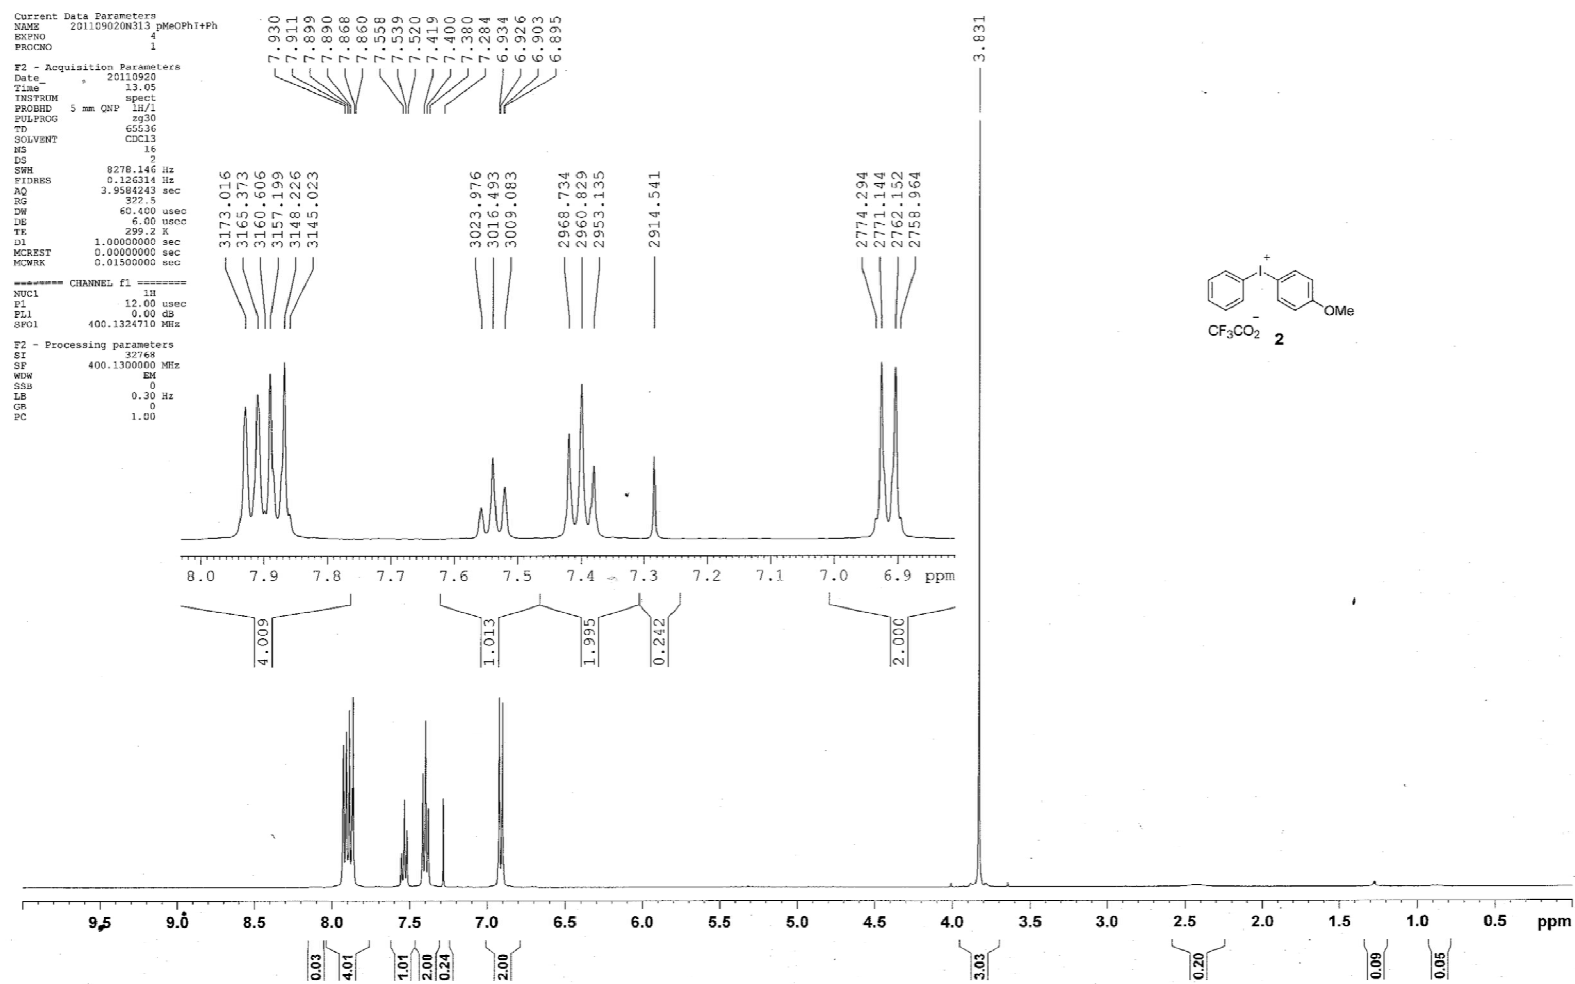

Current Data Parameters  
NAME 201109020M313 pMeOPh+Ph  
EXPNO 3  
PROCNO 1

## F2 - Acquisition Parameters

Date 20110920  
Time 12.57  
INSTRUM spect  
PROBHD 5 mm QNP 1H/1  
PULPROG zgpg30  
TD 65536  
SOLVENT CDCl3  
NS 1024  
DS 4  
SWH 23960.814 Hz  
FIDRES 0.365918 Hz  
AQ 1.3664756 sec  
RG 3224  
DW 20.850 usec  
DE 6.00 usec  
TE 299.2 K  
D1 2.00000000 sec  
d11 0.03000000 sec  
DELTA 1.89999999 sec  
MCREST 0.00000000 sec  
MCWRR 0.01500000 sec

===== CHANNEL f1 =====  
NUC1 13C  
P1 10.00 usec  
PL1 -3.00 dB  
SFO1 100.6228298 MHz

===== CHANNEL f2 =====  
CFOFSG2 waltz16  
NUC2 1H  
PCPD2 80.00 usec  
PL2 0.00 dB  
PL12 17.00 dB  
PL13 17.00 dB  
SFO2 400.1316005 MHz

F2 - Processing parameters  
SI 32768  
SF 100.6127690 MHz  
WDW EM  
SSB 0  
LB 1.00 Hz  
GB 0  
PC 1.40

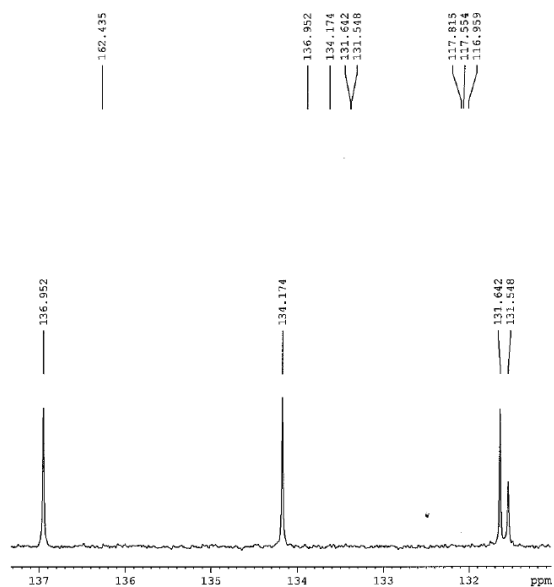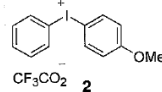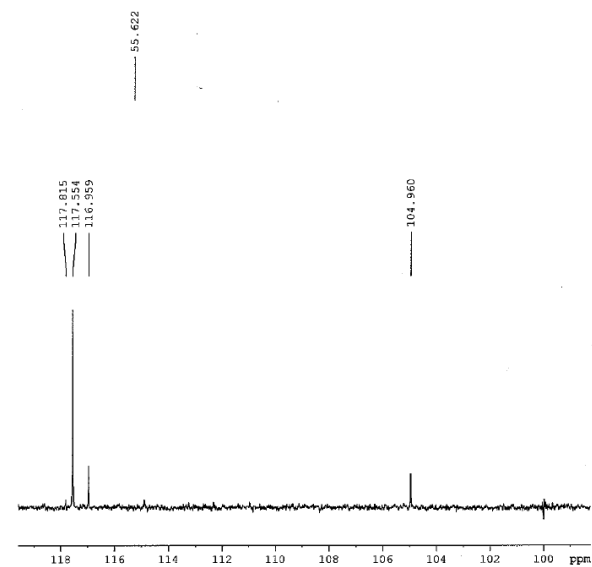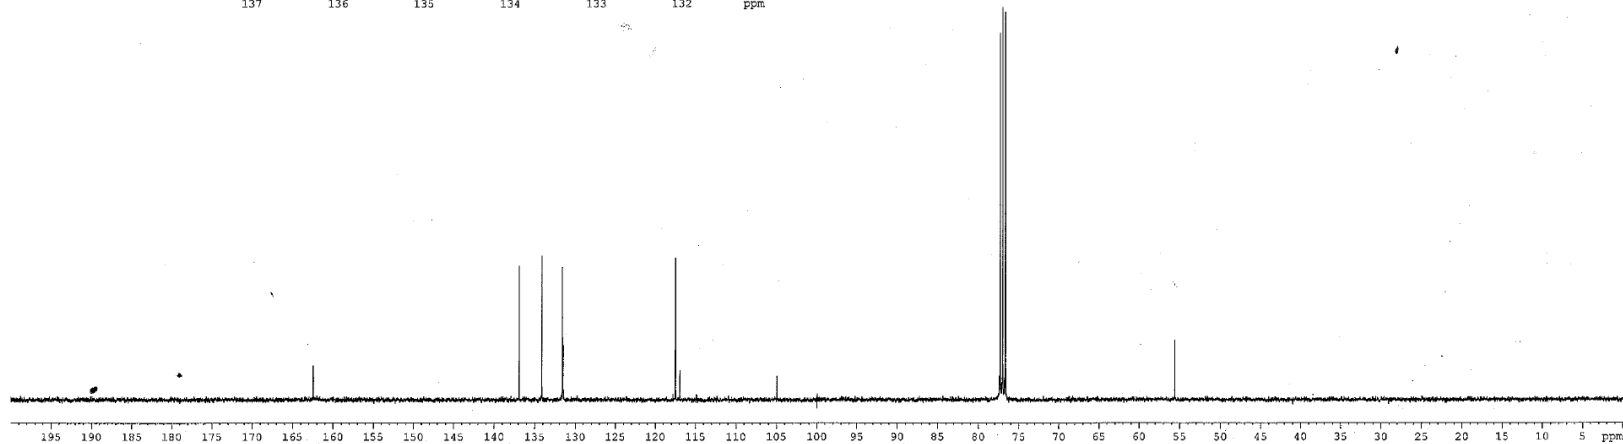

Current Data Parameters  
NAME 201109020N313 pMeOPhI-Ph  
EXPNO 2  
PROCNO 1

F2 - Acquisition Parameters  
Date 20110920  
Time 11.53  
INSTRUM spect  
PROBHD 5 mm QNP  
PULPROG zgpg30  
TD 65536  
SOLVENT CDCl3  
NS 16  
DS 4  
SWH 75187.969 Hz  
FIDRES 0.125002 Hz  
AQ 3.9999983 sec  
RG 1024  
DW 6.650 usec  
DE 6.00 usec  
TE 298.2 K  
D1 1.0000000 sec

===== CHANNEL f1 =====  
NUC1 19F  
P1 12.50 usec  
PL1 -6.00 dB  
SFO1 376.4607044 MHz

F2 - Processing parameters  
SI 65536  
SF 376.4983540 MHz  
WDW EM  
SSB 0  
LB 0.30 Hz  
GB 0  
PC 1.00

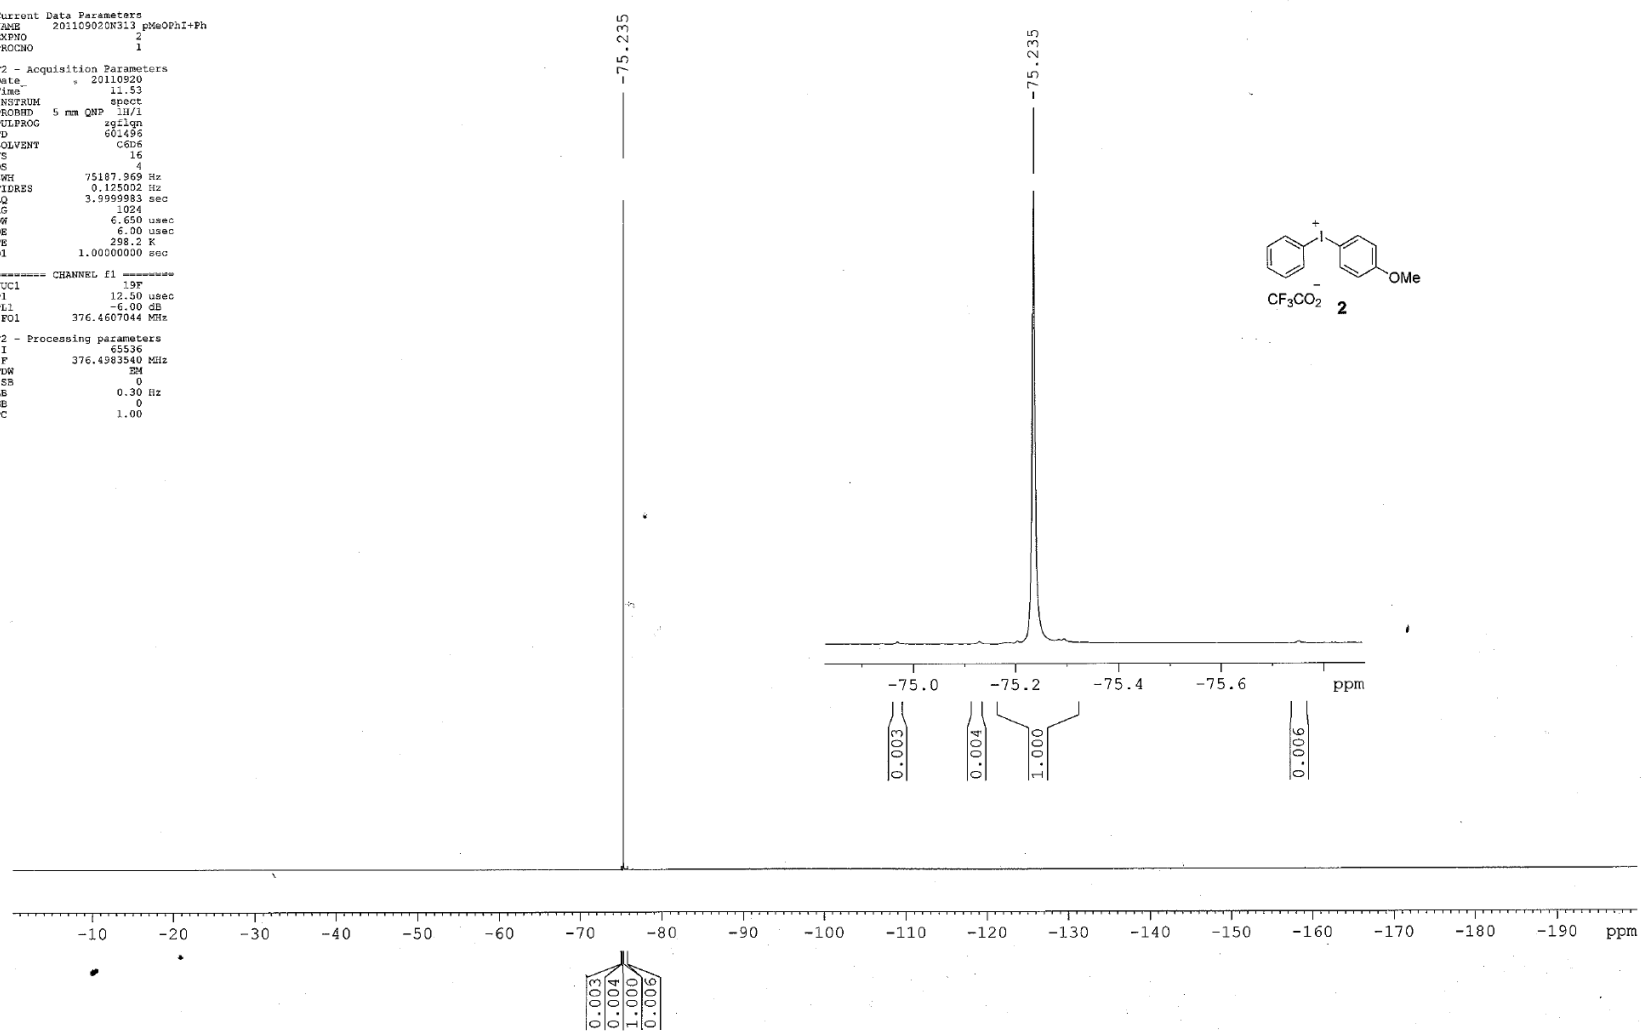

Current Data Parameters  
 NAME 20111014N329 AllBarbi  
 EXPNO 1  
 PROCNO 1

F2 - Acquisition Parameters  
 Date\_ 20111014  
 Time\_ 10.46  
 INSTRUM spect  
 PROBED 5 mm QNP 1H/1  
 PULPROG zg30  
 TD 65536  
 SOLVENT CDCl3  
 NS 16  
 DS 2  
 SWH 8278.146 Hz  
 FIDRES 0.126314 Hz  
 AQ 3.9584243 sec  
 RG 287.4  
 DW 60.400 usec  
 DE 6.00 usec  
 TE 300.2 K  
 DI 1.00000000 sec  
 MCREST 0.00000000 sec  
 MCWRR 0.01500000 sec

===== CHANNEL f1 =====  
 NUC1 1H  
 P1 12.00 usec  
 PL1 0.00 dB  
 SFO1 400.1324710 MHz

F2 - Processing parameters  
 SI 32768  
 SF 400.1300000 MHz  
 WDW EM  
 SSB 0  
 LB 0.30 Hz  
 GB 0  
 PC 1.00

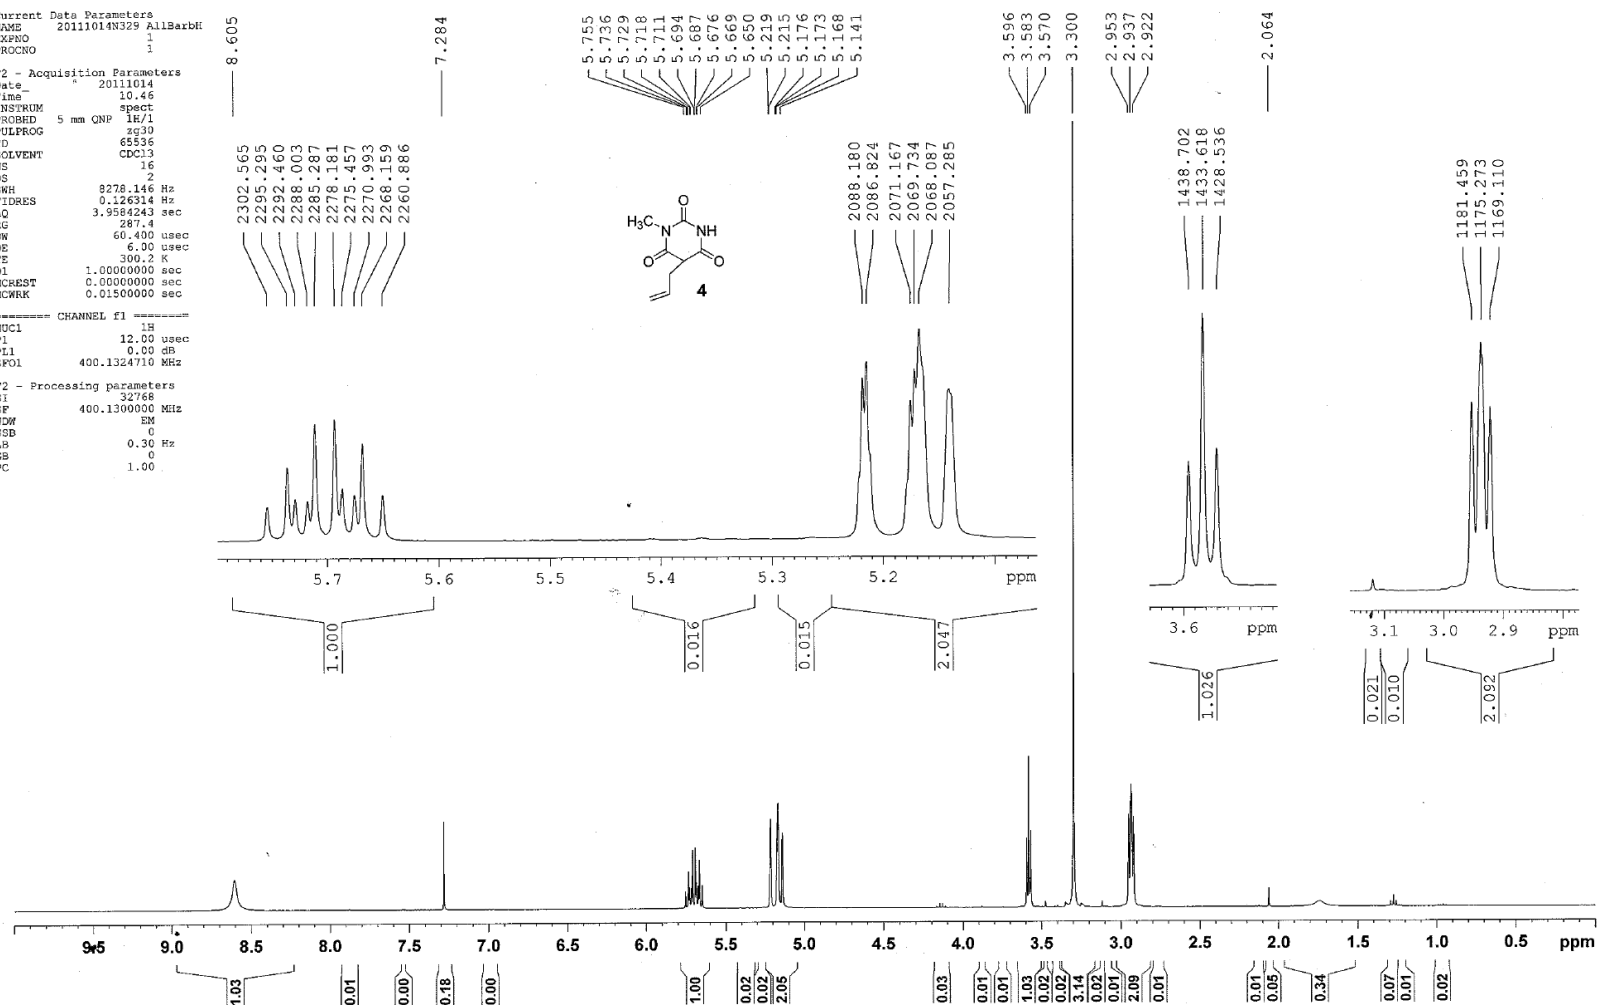



Current Data Parameters  
NAME 20110311S237 AllBarb maj  
EXPNO 2  
PROCNO 1

F2 - Acquisition Parameters  
Date 20110311  
Time 15.34  
INSTRUM spect  
PROBHD 5 mm PABBO BB-  
PULPROG zgpg30  
TD 65536  
SOLVENT CDCl3  
NS 719  
DS 4  
SWH 23980.814 Hz  
FIDRES 0.365918 Hz  
AQ 1.3664756 sec  
RG 912.3  
SW 20.850 usec  
DE 6.00 usec  
TE 297.4 K  
D1 2.0000000 sec  
d11 0.0300000 sec  
DELTA 1.8999999 sec  
MCPUST 0.0000000 sec  
MCWRK 0.0150000 sec

CHANNEL F1  
NUC1 13C  
P1 9.50 usec  
PL1 -2.00 dB  
SFO1 100.6328888 MHz

CHANNEL F2  
CPDPRG2 waltz16  
NUC2 1H  
PCPD2 80.00 usec  
PL2 -2.00 dB  
PL12 14.30 dB  
PL13 14.00 dB  
SFO2 400.1716007 MHz

F2 - Processing parameters  
SI 32768  
SF 100.6226270 MHz  
WDW EM  
SSB 0  
LB 1.00 Hz  
GB 0  
PC 1.40

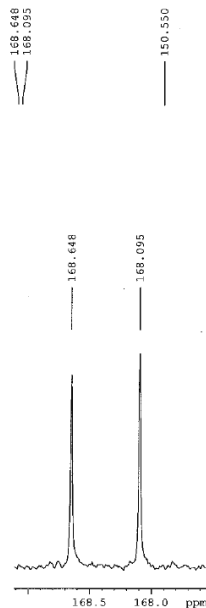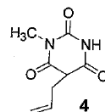

77.371  
77.054  
76.736

50.453

48.771

34.185

27.965  
27.771

21.047

14.180

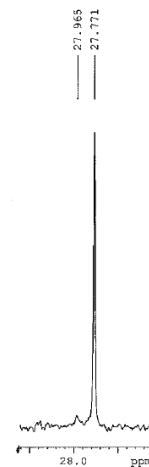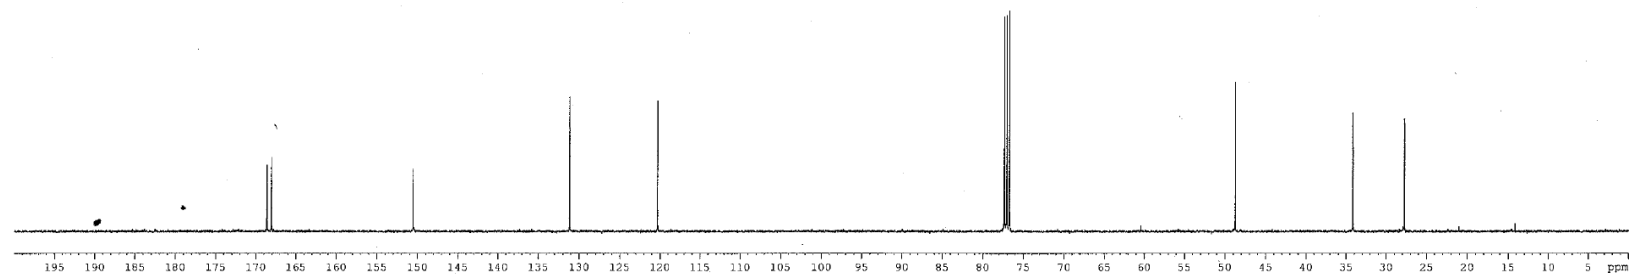

Current Data Parameters  
 NAME 2011110N3476248 PnBarbAll  
 EXPNO 1  
 PROCNO 1

F2 - Acquisition Parameters  
 Date 20111118  
 Time 14.41  
 INSTRUM spect  
 PROBRD 5 mm QNP 1H/1  
 PULPROG zgpg30  
 TD 65536  
 SOLVENT CDC13  
 NS 1024  
 DS 4  
 SWH 23980.814 Hz  
 FIDRES 0.365918 Hz  
 AQ 1.3664758 sec  
 RG 1448.2  
 DW 20.850 usec  
 DE 6.00 usec  
 TE 299.2 K  
 DL 2.00000000 sec  
 d11 0.03000000 sec  
 DELTA 1.89999998 sec  
 MCREST 0.00000000 sec  
 MCWEX 0.01500000 sec

----- CHANNEL f1 -----  
 NUC1 13C  
 P1 10.00 usec  
 PL1 -3.00 dB  
 SFO1 100.628298 MHz

----- CHANNEL f2 -----  
 CDEPRG2 waltz16  
 NUC2 1H  
 PCPD2 80.00 usec  
 PL2 0.00 dB  
 PL12 17.00 dB  
 PL13 17.00 dB  
 SFO2 400.1316005 MHz

F2 - Processing parameters  
 SI 32768  
 SF 100.6127690 MHz  
 WDW EM  
 SSB 0  
 LB 1.00 Hz  
 GB 0  
 PC 1.40

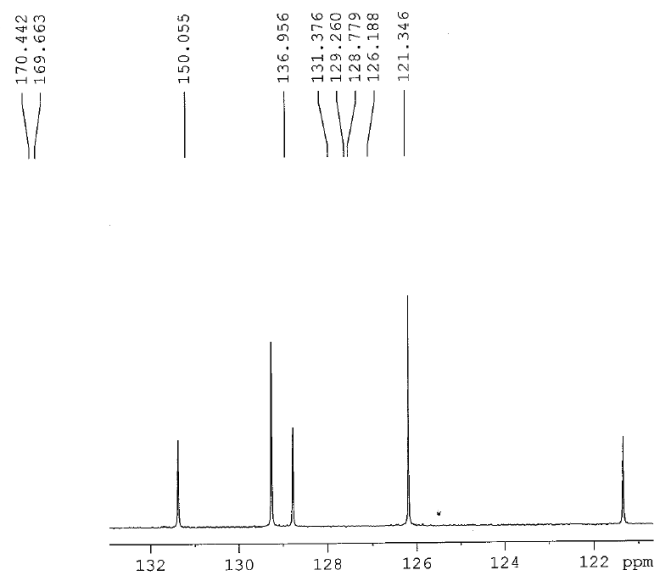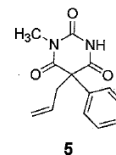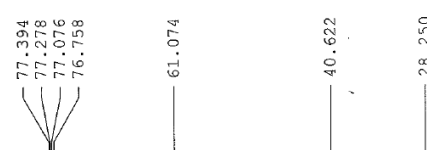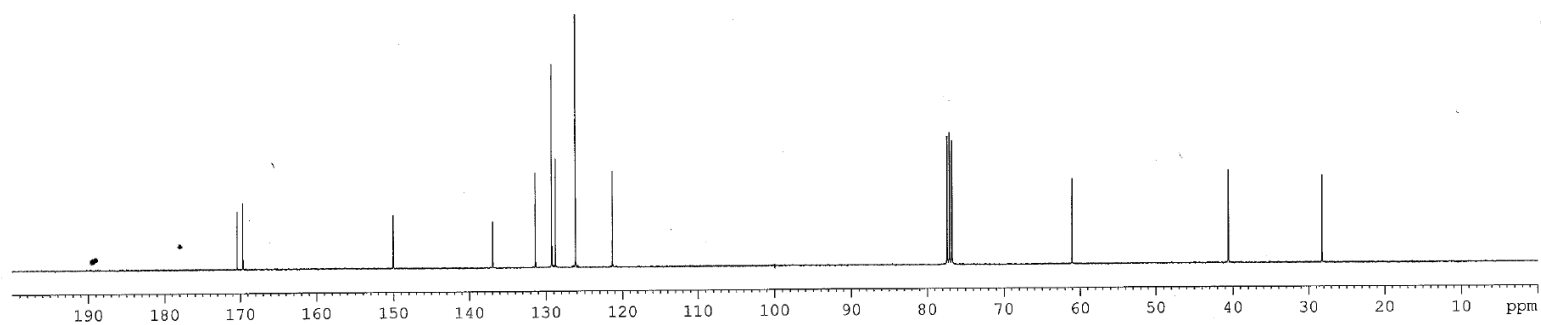

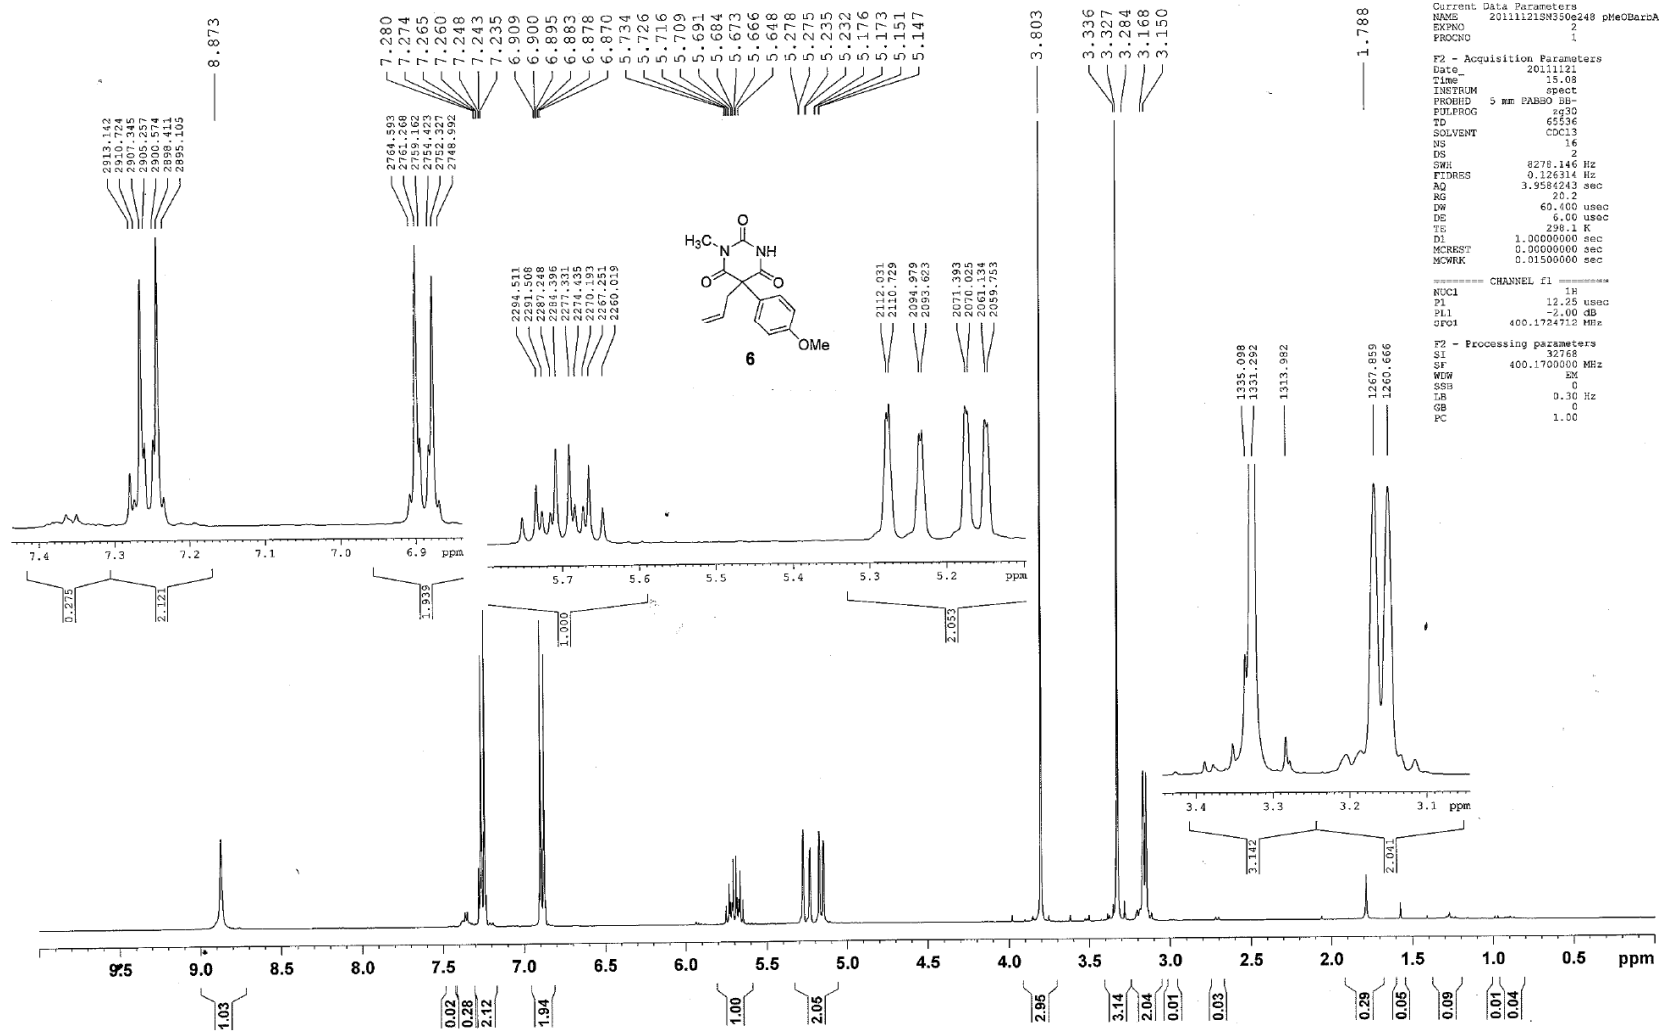

Current Data Parameters  
 NAME 20111218H35e248 pMeOBarh11  
 EXPNO 3  
 PROCNO 1

F2 - Acquisition Parameters  
 Date\_ 20111211  
 Time 16.13  
 INSTRUM spect  
 PROBRD 5 mm PABBO BB-  
 PULPROG zgpg30  
 TD 65536  
 SOLVENT CDCl3  
 NS 932  
 DS 4  
 SWE 23980.814 Hz  
 FIDRES 0.365918 Hz  
 AQ 1.3664756 sec  
 RG 912.3  
 DW 20.880 usec  
 DE 6.00 usec  
 TE 298.6 K  
 D1 2.00000000 sec  
 d11 0.03000000 sec  
 DELTA 1.89999998 sec  
 NUCHEST 0.00000000 sec  
 MCKKK 0.01500000 sec

===== CHANNEL f1 =====  
 NUC1 13C  
 P1 9.50 usec  
 PL1 2.00 dB  
 SFO1 100.628270 MHz

===== CHANNEL f2 =====  
 CPDPRG2 waltz16  
 NUC2 1H  
 PCPD2 80.00 usec  
 PL2 -2.00 dB  
 PL12 14.30 dB  
 PL13 14.00 dB  
 SFO2 400.1716007 MHz

F2 - Processing parameters  
 SI 32768  
 SF 100.628270 MHz  
 NQW EM  
 SSB 0  
 LB 3.00 Hz  
 GB 0  
 PC 1.40

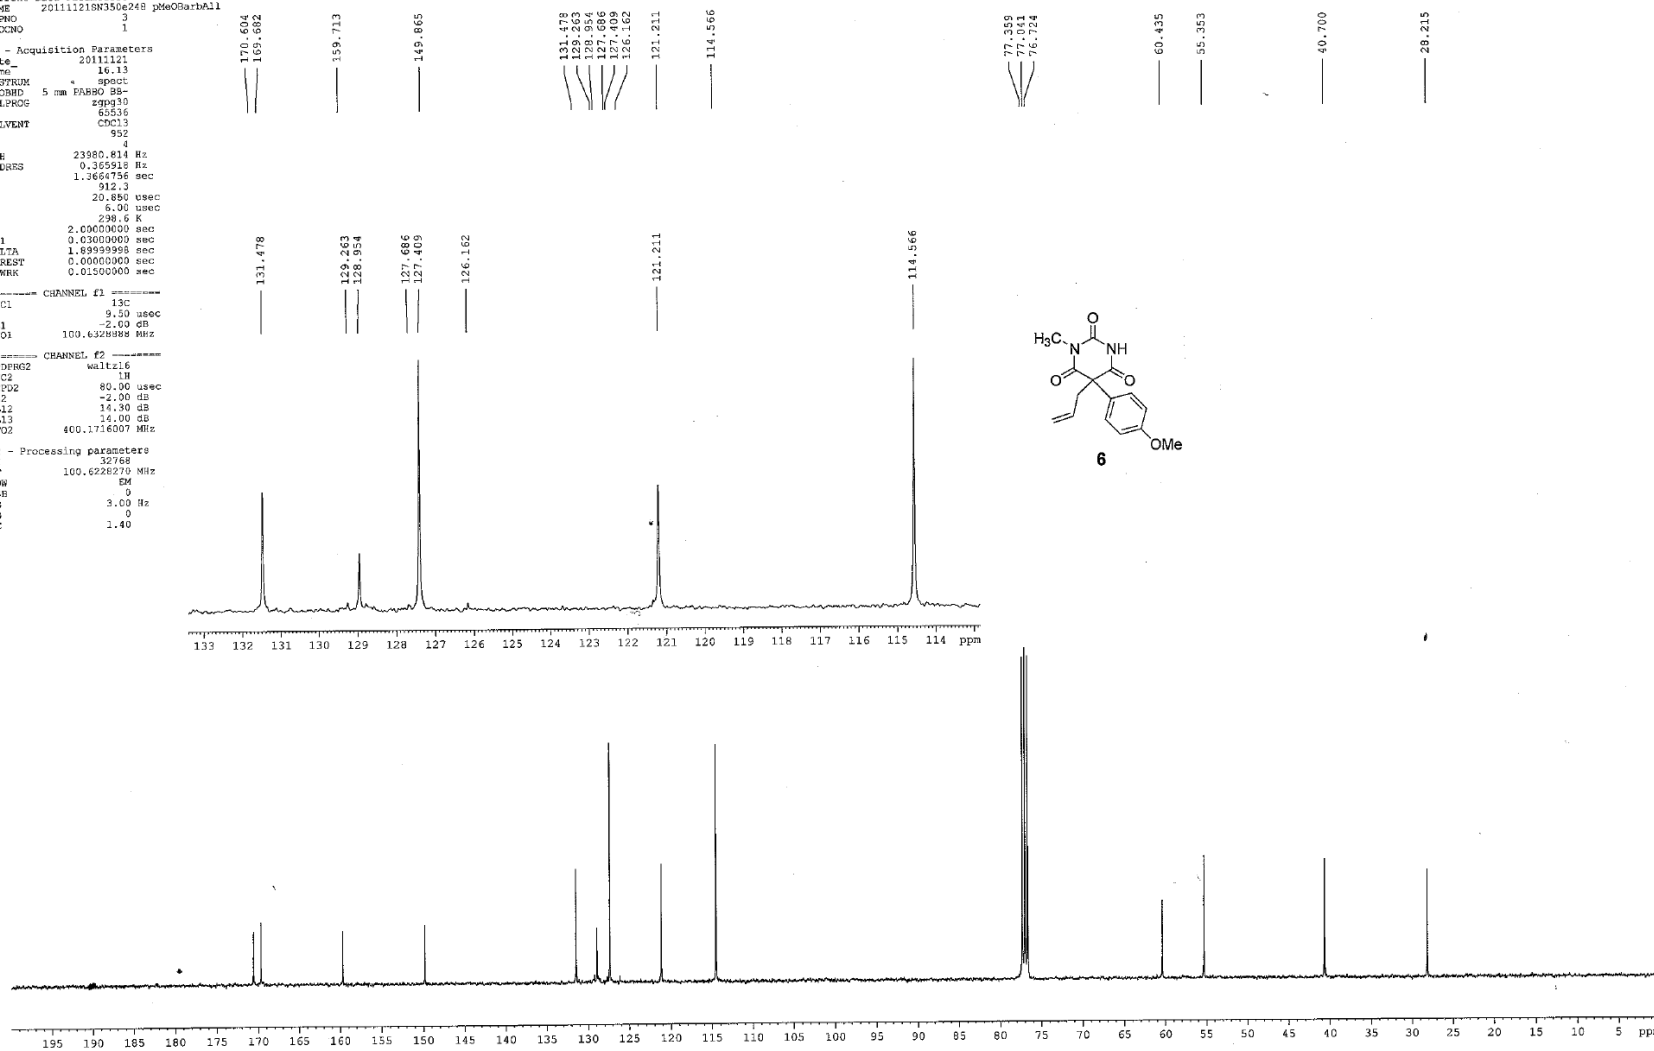

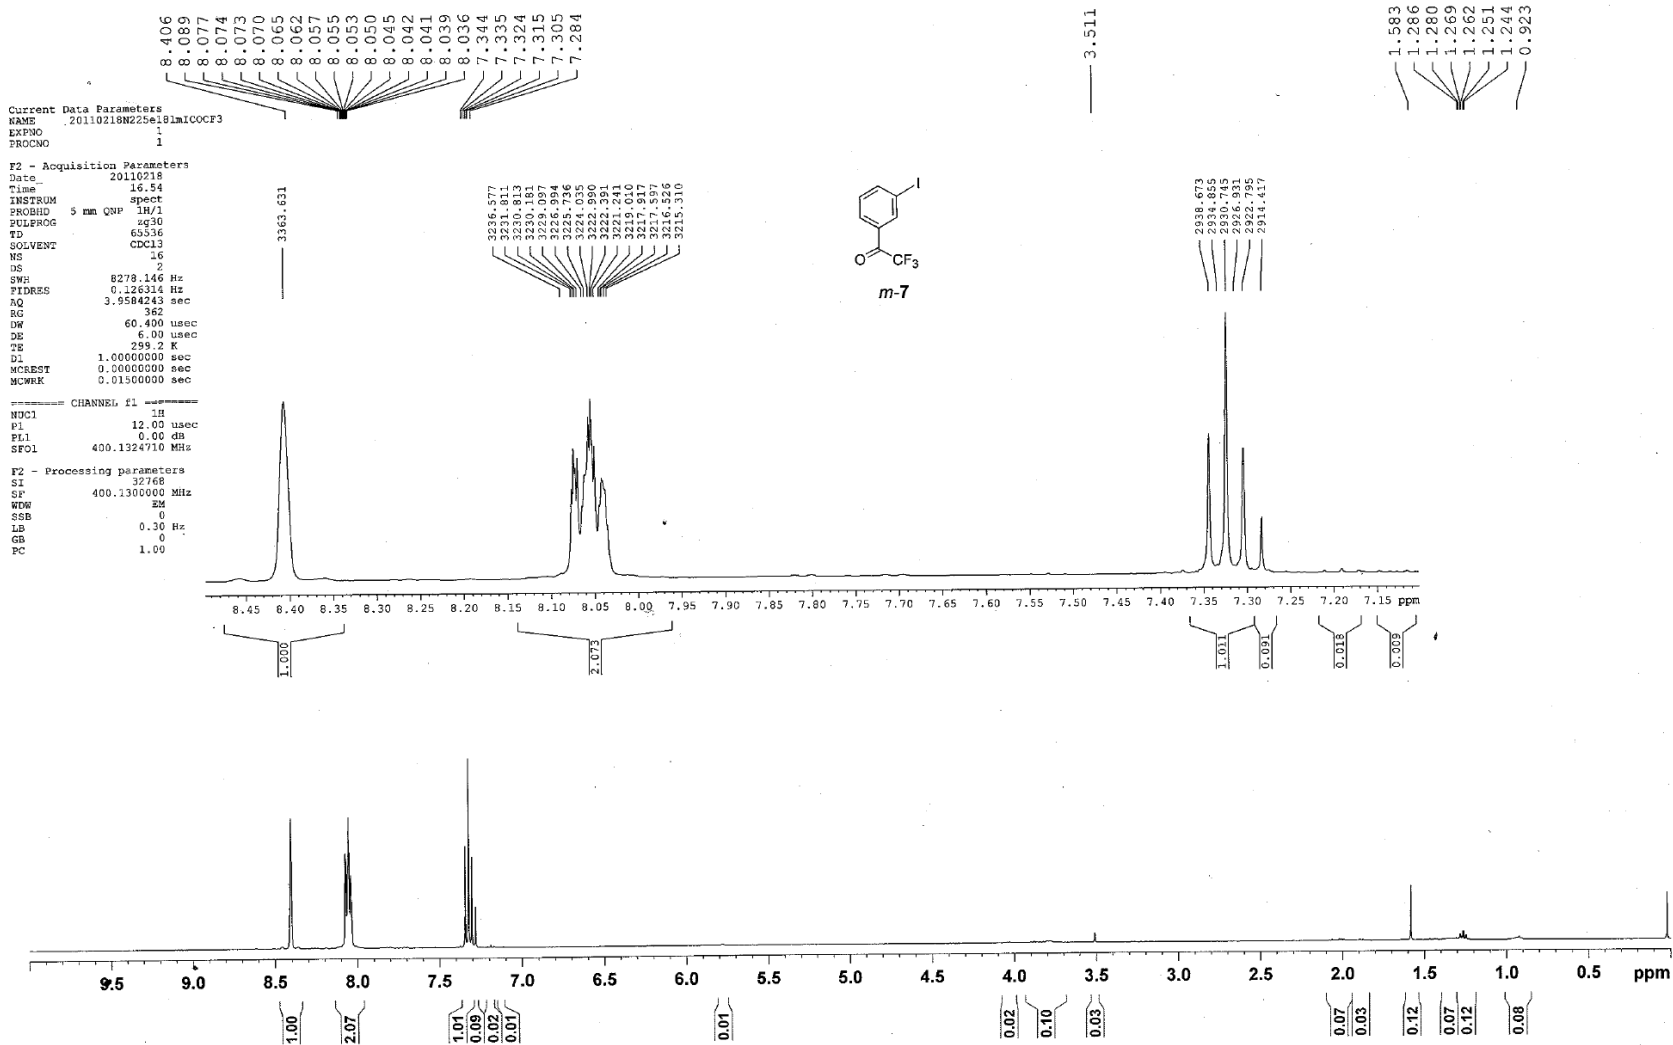

Current Data Parameters  
NAME 20110218n225e181m1COCF3  
EXPNO 3  
PROCNO 1

F2 - Acquisition Parameters  
Date\_ 20110218  
Time 17.29  
INSTRUM spect  
PROBHD 5 mm QNP 1H/1  
PULPROG zgpg30  
TD 65536  
SOLVENT CDCl3  
NS 941  
DS 4  
SWH 23980.814 Hz  
FIDRES 0.365918 Hz  
AQ 1.3664756 sec  
RG 645.1  
DW 20.850 usec  
DE 6.00 usec  
TE 298.2 K  
D1 2.00000000 sec  
d11 0.03000000 sec  
DELTA 1.89999999 sec  
MCREST 0.00000000 sec  
MCWRR 0.01500000 sec

CHANNEL f1  
NUC1 13C  
P1 10.00 usec  
PL1 -3.00 dB  
SFO1 100.6228298 MHz

CHANNEL f2  
CPDPRG2 waltz16  
NUC2 1H  
PCPD2 80.30 usec  
PL2 0.00 dB  
PL12 17.00 dB  
PL13 17.00 dB  
SFO2 400.1316005 MHz

F2 - Processing parameters  
SI 32768  
SF 100.6127690 MHz  
WDW EM  
SSB 0  
LB 1.00 Hz  
GB 0  
PC 1.40

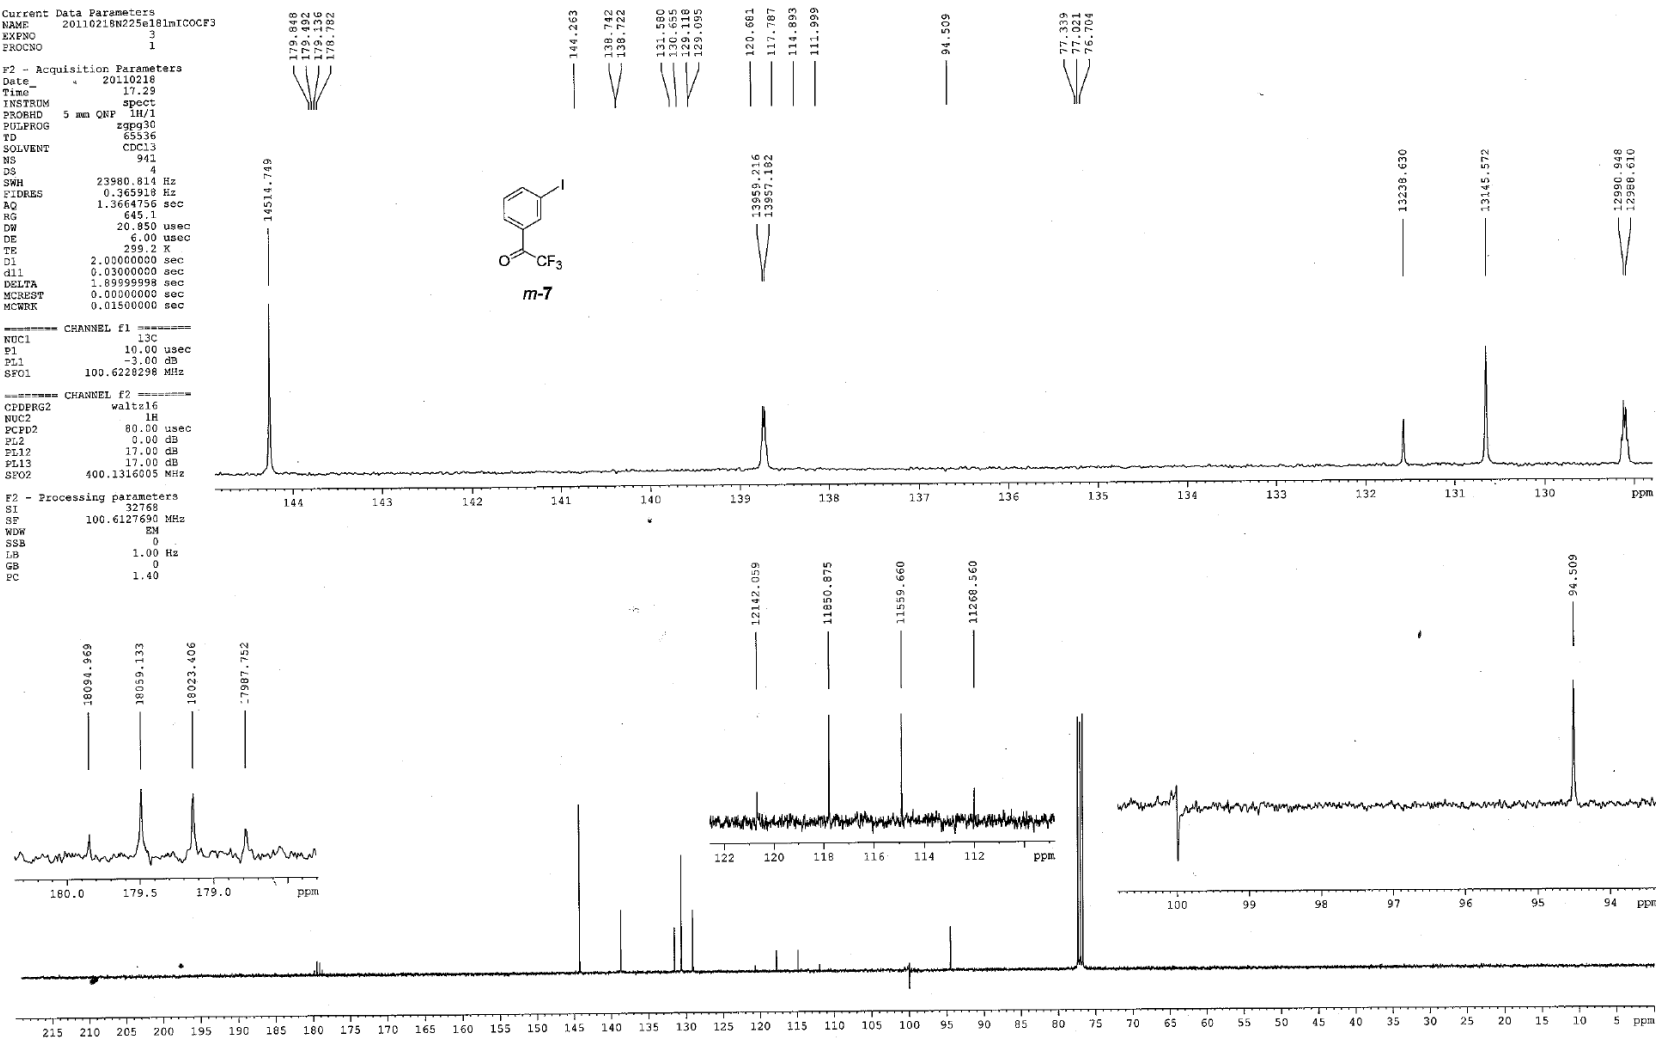

F19

Current Data Parameters  
NAME 20110218N225181m100CF3  
EXTNO 2  
PROCNO 1

F2 - Acquisition Parameters  
Date 20110218  
Time 17.00  
INSTRUM spect  
PROBHD 5 mm QNP 1H/1  
PULPROG zgpg30  
TD 601496  
SOLVENT C6D6  
NS 16  
DS 4  
SWH 75187.969 Hz  
FIDRES 0.125002 Hz  
AQ 3.9999983 sec  
RG 574.7  
DW 6.650 usec  
DE 6.00 usec  
TE 299.2 K  
D1 1.00000000 sec

===== CHANNEL f1 =====  
NUC1 19F  
P1 12.50 usec  
PL1 -6.00 dB  
SFO1 376.4607044 MHz

F2 - Processing parameters  
SI 65536  
SF 376.4603540 MHz  
WDW EM  
SSB 0  
LB 0.30 Hz  
GB 0  
PC 1.00

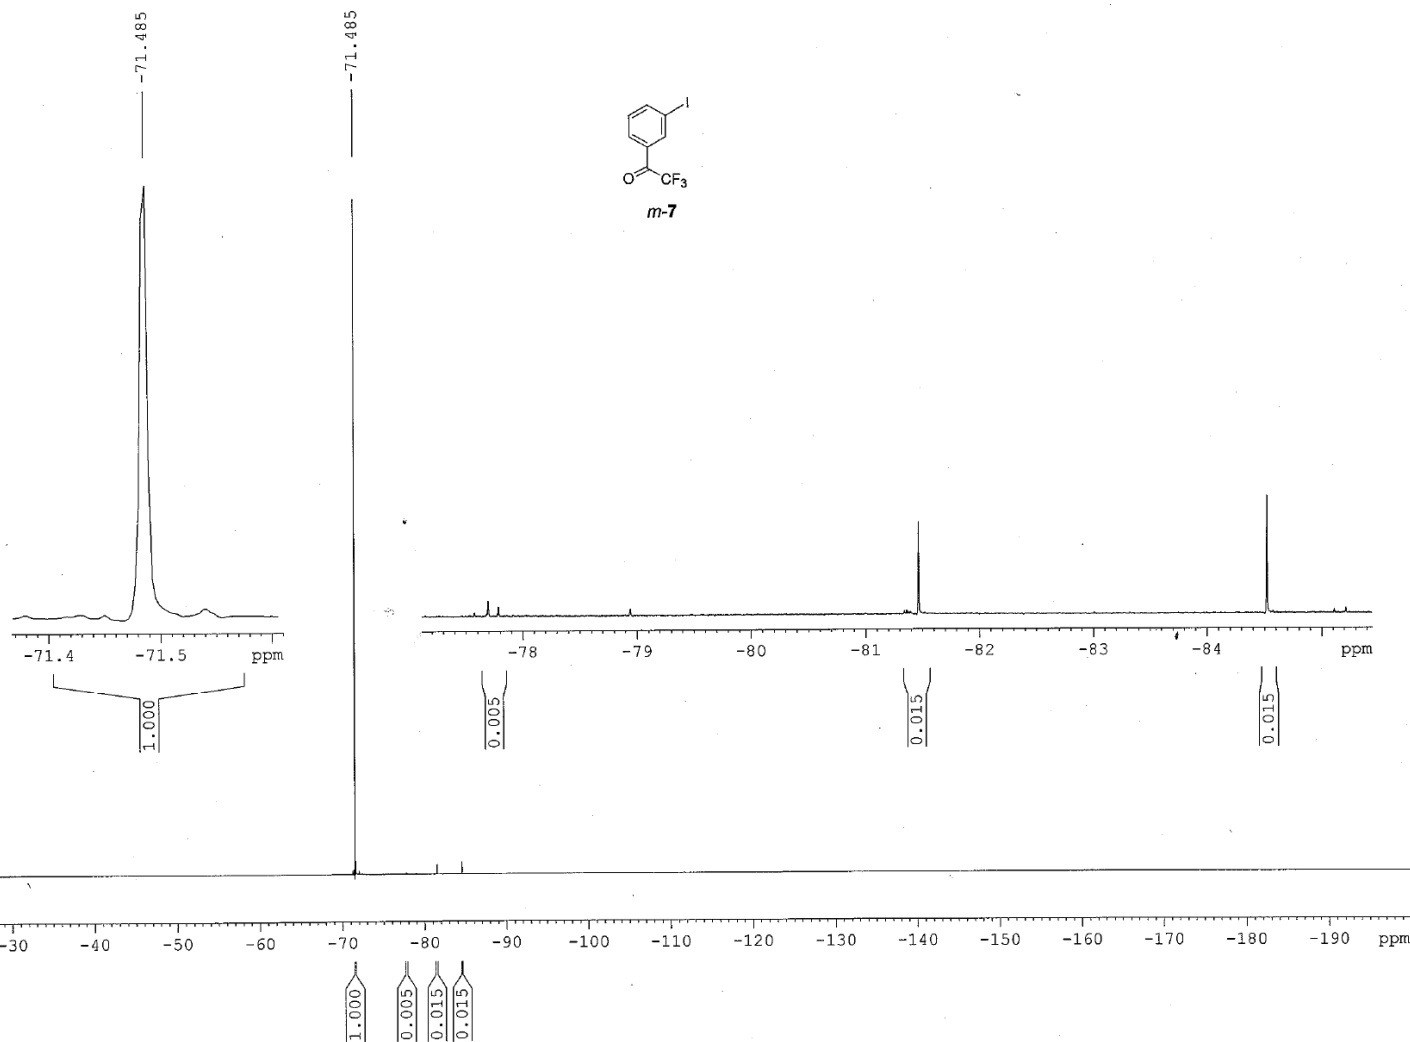

Current Data Parameters  
NAME 201109019H311 pPhCOCF3  
EXPNO 1  
PROCNO 1

F2 - Acquisition Parameters  
Date\_ 20110919  
Time 15.51  
INSTRUM spect  
PROBHD 5 mm QNP 1H/1  
PULPROG zg30  
TD 65536  
SOLVENT CDCl3  
NS 16  
DS 2  
SWH 8278.146 Hz  
FIDRES 0.126314 Hz  
AQ 3.9584243 sec  
RG 228.1  
DW 60.400 usec  
DE 6.00 usec  
TE 298.2 K  
D1 1.00000000 sec  
MCOREST 0.00000000 sec  
MCWRR 0.01500000 sec

CHANNEL f1 -----  
NUC1 1H  
P1 12.00 usec  
PL1 0.00 dB  
SFO1 400.1324710 MHz

F2 - Processing parameters  
SI 32768  
SF 400.1300000 MHz  
WDW EM  
SSB 0  
LB 0.30 Hz  
GB 0  
PC 1.00

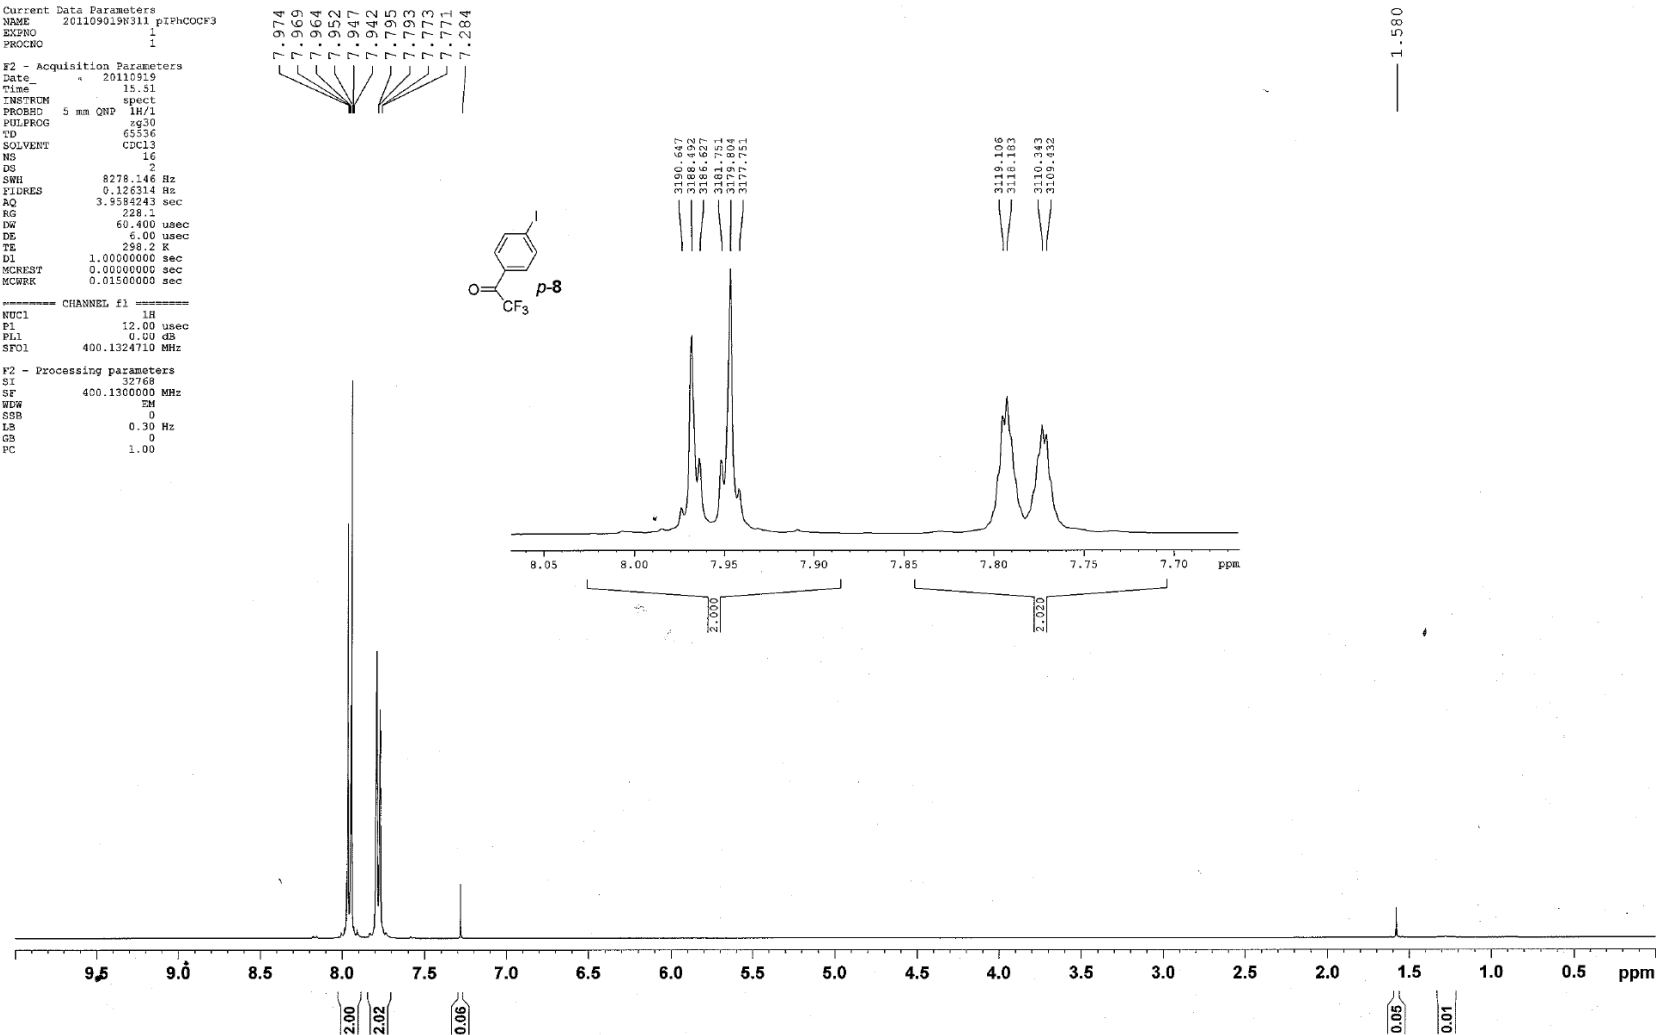



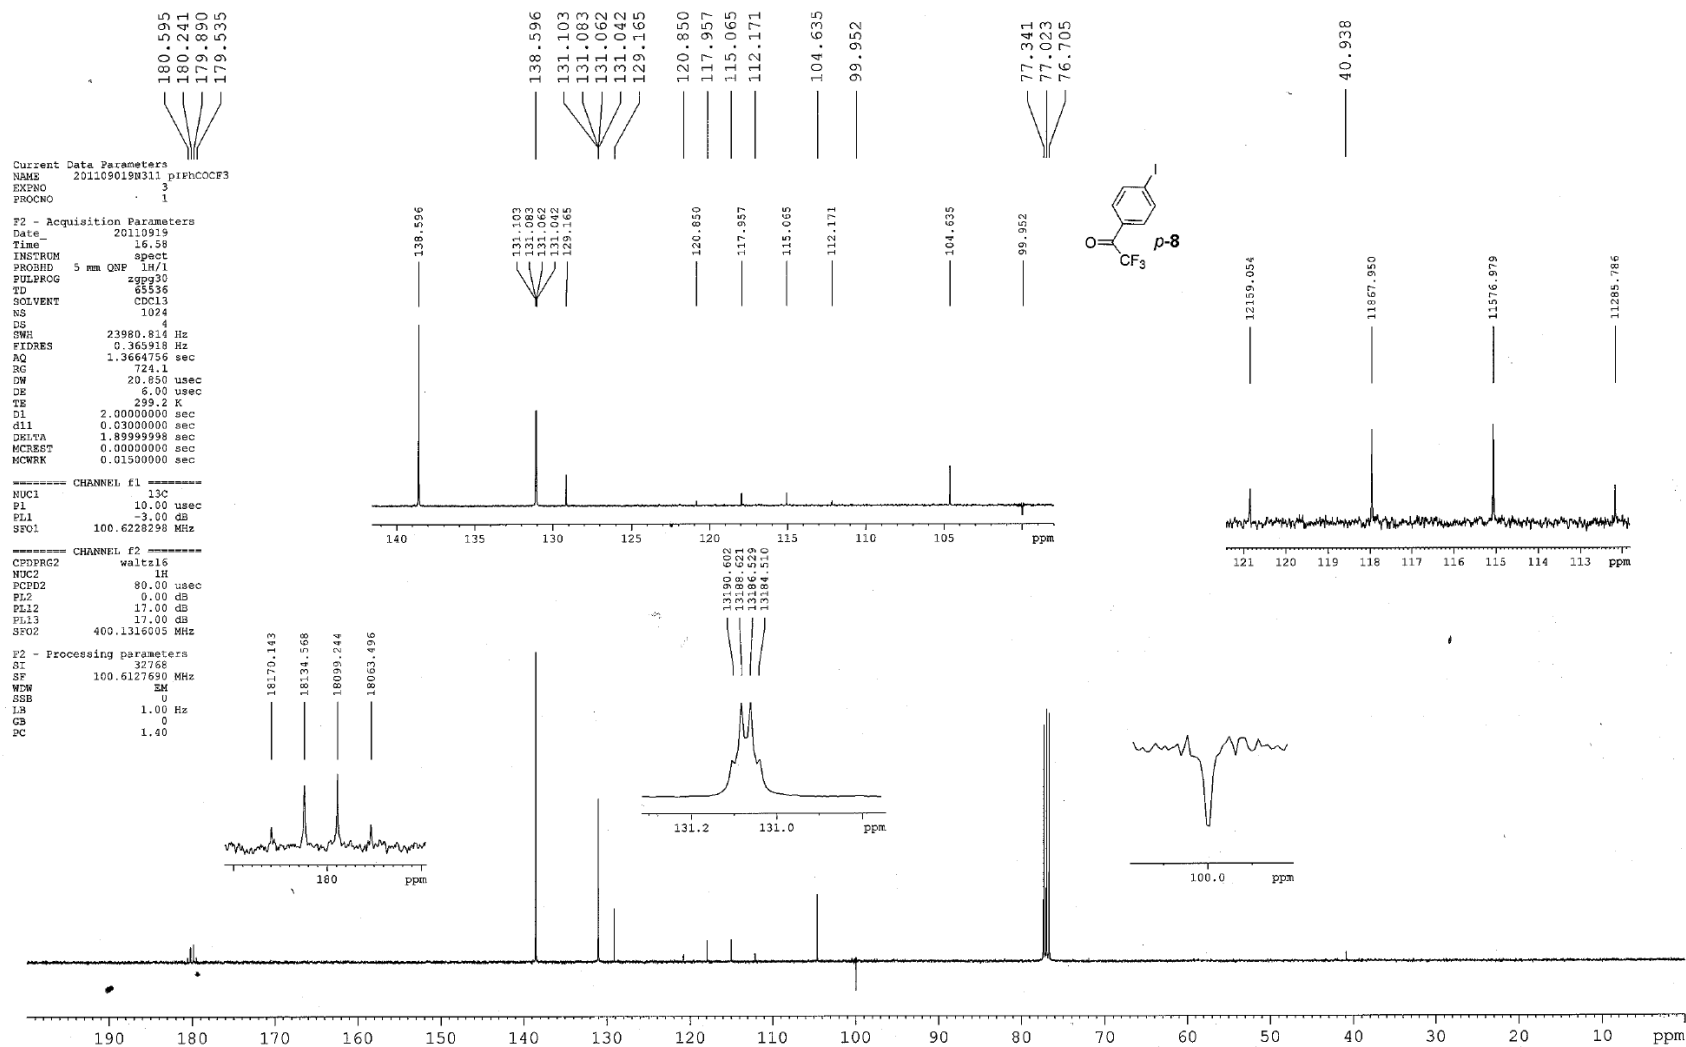

Current Data Parameters  
NAME 201109019W311 pPhCOCF3  
EXPNO 2  
PROCNO 1

F2 - Acquisition Parameters  
Date\_ 20110919  
Time 15.55  
INSTRUM spect  
PROBHD 5 mm QNP 1H/1  
FOLPROG zgpg30  
TD 45120  
SOLVENT C6D6  
NS 16  
DS 4  
SWH 75187.969 Hz  
FIDRES 0.166670 Hz  
AQ 2.9999981 sec  
RG 512  
DW 6.650 usec  
DE 6.00 usec  
TE 298.2 K  
D1 1.00000000 sec

===== CHANNEL f1 =====  
NUC1 19F  
P1 12.50 usec  
PL1 0.00 db  
SEDL 376.4607044 MHz

F2 - Processing parameters  
SI 65536  
SF 376.4983540 MHz  
WDW EM  
SSB 0  
LB 0.30 Hz  
GB 0  
PC 1.00

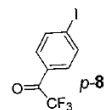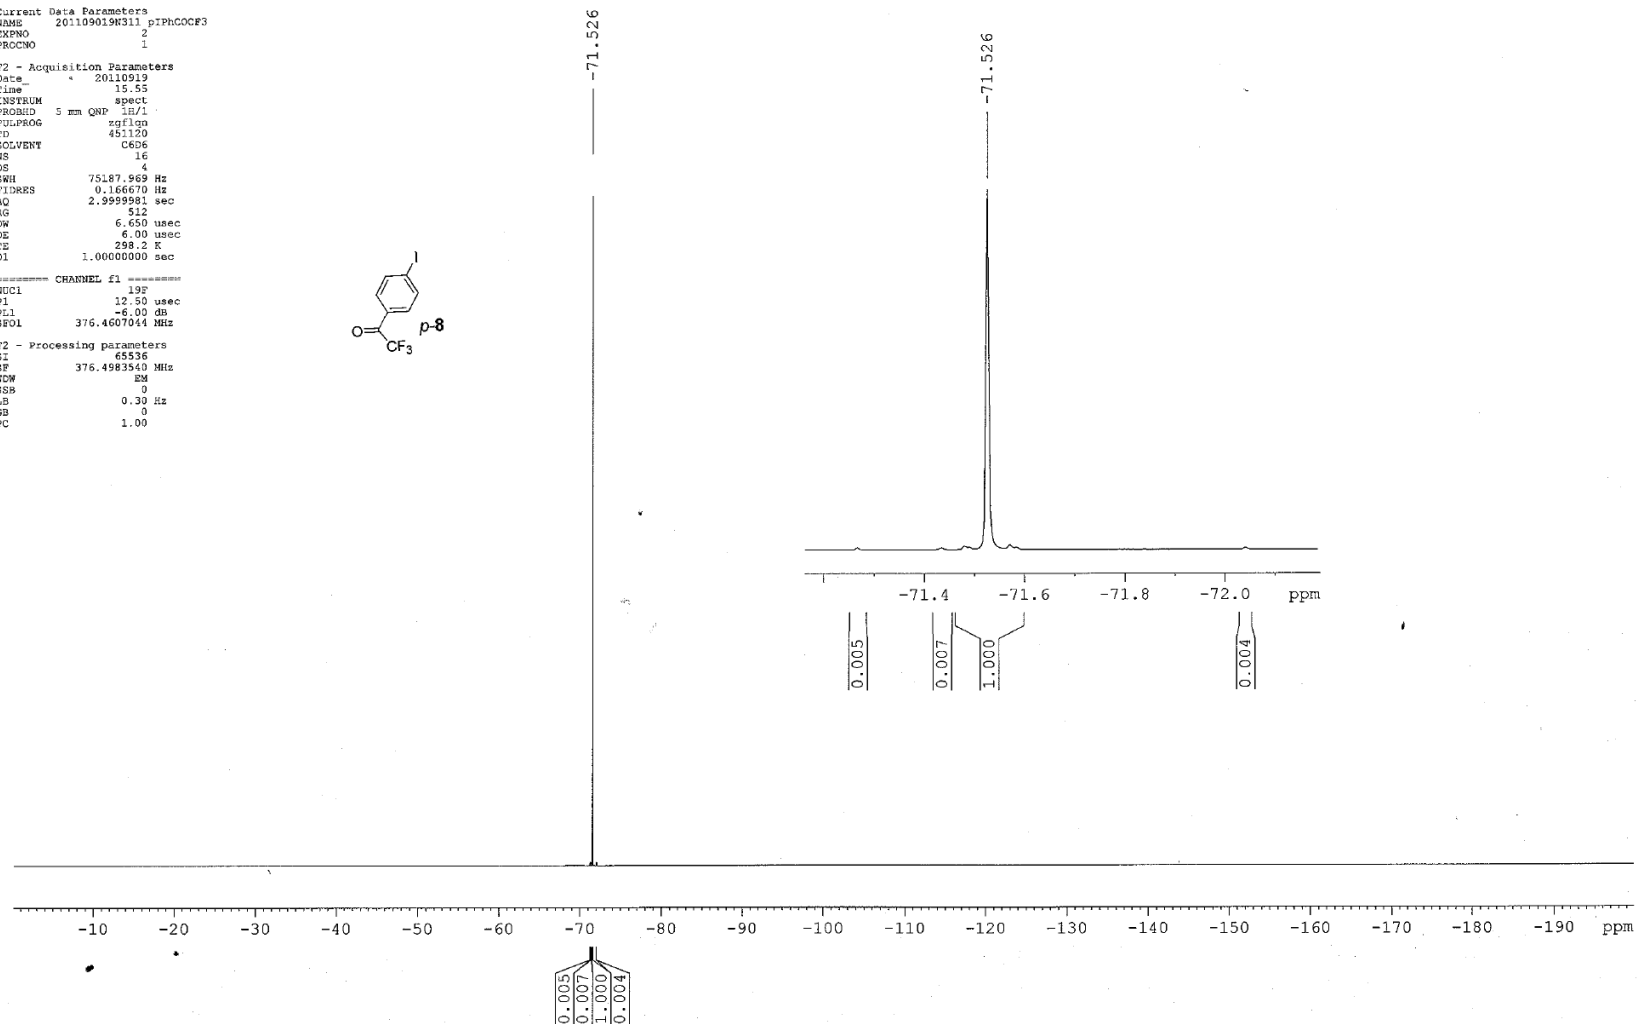

Current Data Parameters  
 NAME 20110907N308 mDPhI  
 EXPNO 1  
 PROCNO 1

F2 - Acquisition Parameters  
 Date\_ 20110907  
 Time 11.19  
 INSTRUM spect  
 PROBHD 5 mm QNP 1H/1  
 PULPROG zg30  
 TD 65536  
 SOLVENT CDCl3  
 NS 16  
 DS 2  
 SWH 8278.146 Hz  
 FIDRES 0.126314 Hz  
 AQ 3.9584243 sec  
 RG 228.1  
 DW 60.400 usec  
 DE 6.00 usec  
 TE 298.2 K  
 D1 1.00000000 sec  
 MCREST 0.00000000 sec  
 MCWRR 0.01500000 sec

===== CHANNEL f1 =====  
 NUC1 1H  
 P1 12.00 usec  
 PL1 0.00 dB  
 SFO1 400.1324710 MHz

F2 - Processing parameters  
 SI 32768  
 SF 400.1300000 MHz  
 WDW EM  
 SSB 0  
 LB 0.30 Hz  
 GB 0  
 PC 1.00

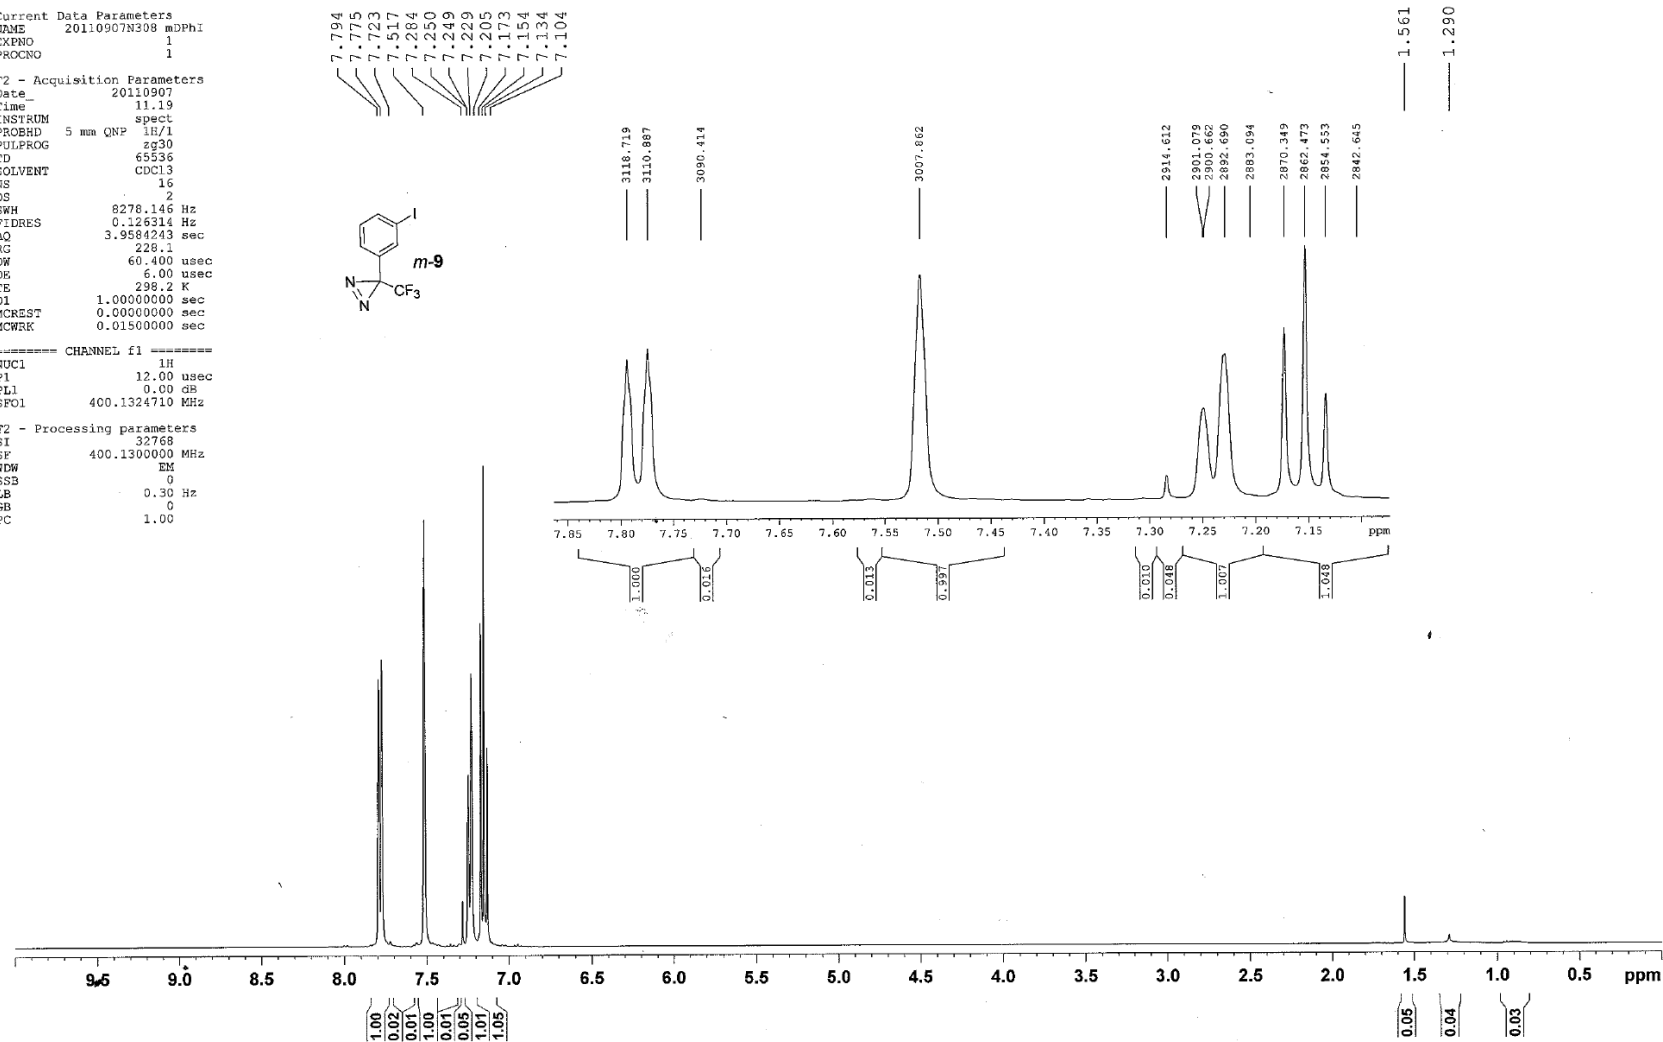

Current Data Parameters  
 NAME 20110907N308 mDPH1  
 EXPNO 3  
 PROCNO 1

F2 - Acquisition Parameters  
 Date 20110907  
 Time 13.00  
 INSTRUM spect  
 PROBRD 5 mm QNP 1H/1  
 PULPROG zgpg30  
 TD 65536  
 SOLVENT CDCl3  
 NS 1563  
 DS 4  
 SWH 23980.814 Hz  
 FIDRES 0.365918 Hz  
 AQ 1.3664756 sec  
 RG 724.1  
 DW 20.850 usec  
 DE 6.00 usec  
 TE 299.2 K  
 D1 2.00000000 sec  
 d11 0.03000000 sec  
 DELTA 1.89999998 sec  
 MCREST 0.00000000 sec  
 MCWRK 0.01500000 sec

===== CHANNEL f1 =====  
 NUC1 13C  
 P1 10.00 usec  
 PL1 -3.00 dB  
 SFO1 100.6228298 MHz

===== CHANNEL f2 =====  
 CPDPRG2 waltz16  
 NUC2 1H  
 PCPD2 80.00 usec  
 PL2 0.00 dB  
 PL12 17.00 dB  
 PL13 17.00 dB  
 SFO2 400.1316005 MHz

F2 - Processing parameters  
 SI 32768  
 SF 100.6127690 MHz  
 WDW EM  
 SSB 0  
 LB 1.00 Hz  
 GB 0  
 PC 1.60

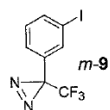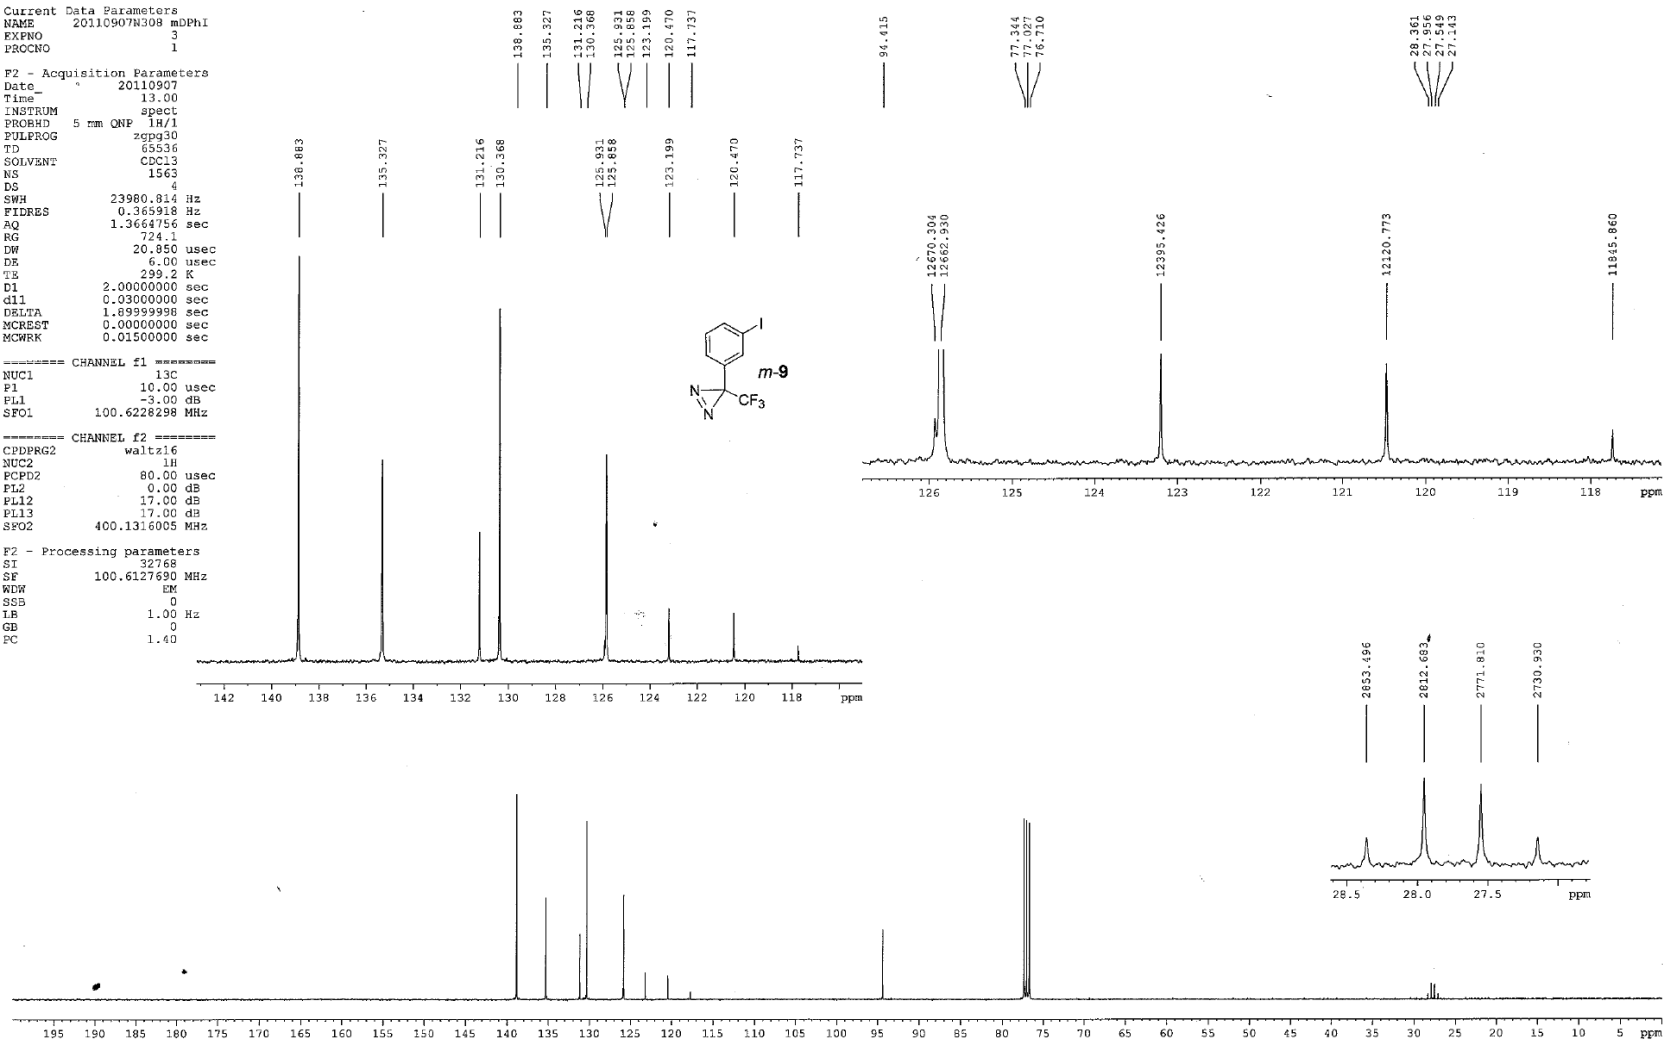

F19

Current Data Parameters  
NAME 20110907N308 mDPHI  
EXPNO 2  
PROCNO 1

F2 - Acquisition Parameters  
Date 20110907  
Time 11.25  
INSTRUM spect  
PROBHD 5 mm QNP 1H/1  
PULPROG zgpg30  
TD 300744  
SOLVENT C6D6  
NS 16  
DS 4  
SWH 75187.969 Hz  
FIDRES 0.250007 Hz  
AQ 1.9999976 sec  
RG 406.4  
DW 6.650 usec  
DE 6.00 usec  
TE 298.2 K  
D1 1.00000000 sec

===== CHANNEL f1 =====  
NUC1 19F  
P1 12.50 usec  
PL1 -6.00 dB  
SFO1 376.4607044 MHz

F2 - Processing parameters  
SI 65536  
SF 376.4983540 MHz  
WDW EM  
SSB 0  
LB 0.30 Hz  
GB 0  
PC 1.00

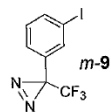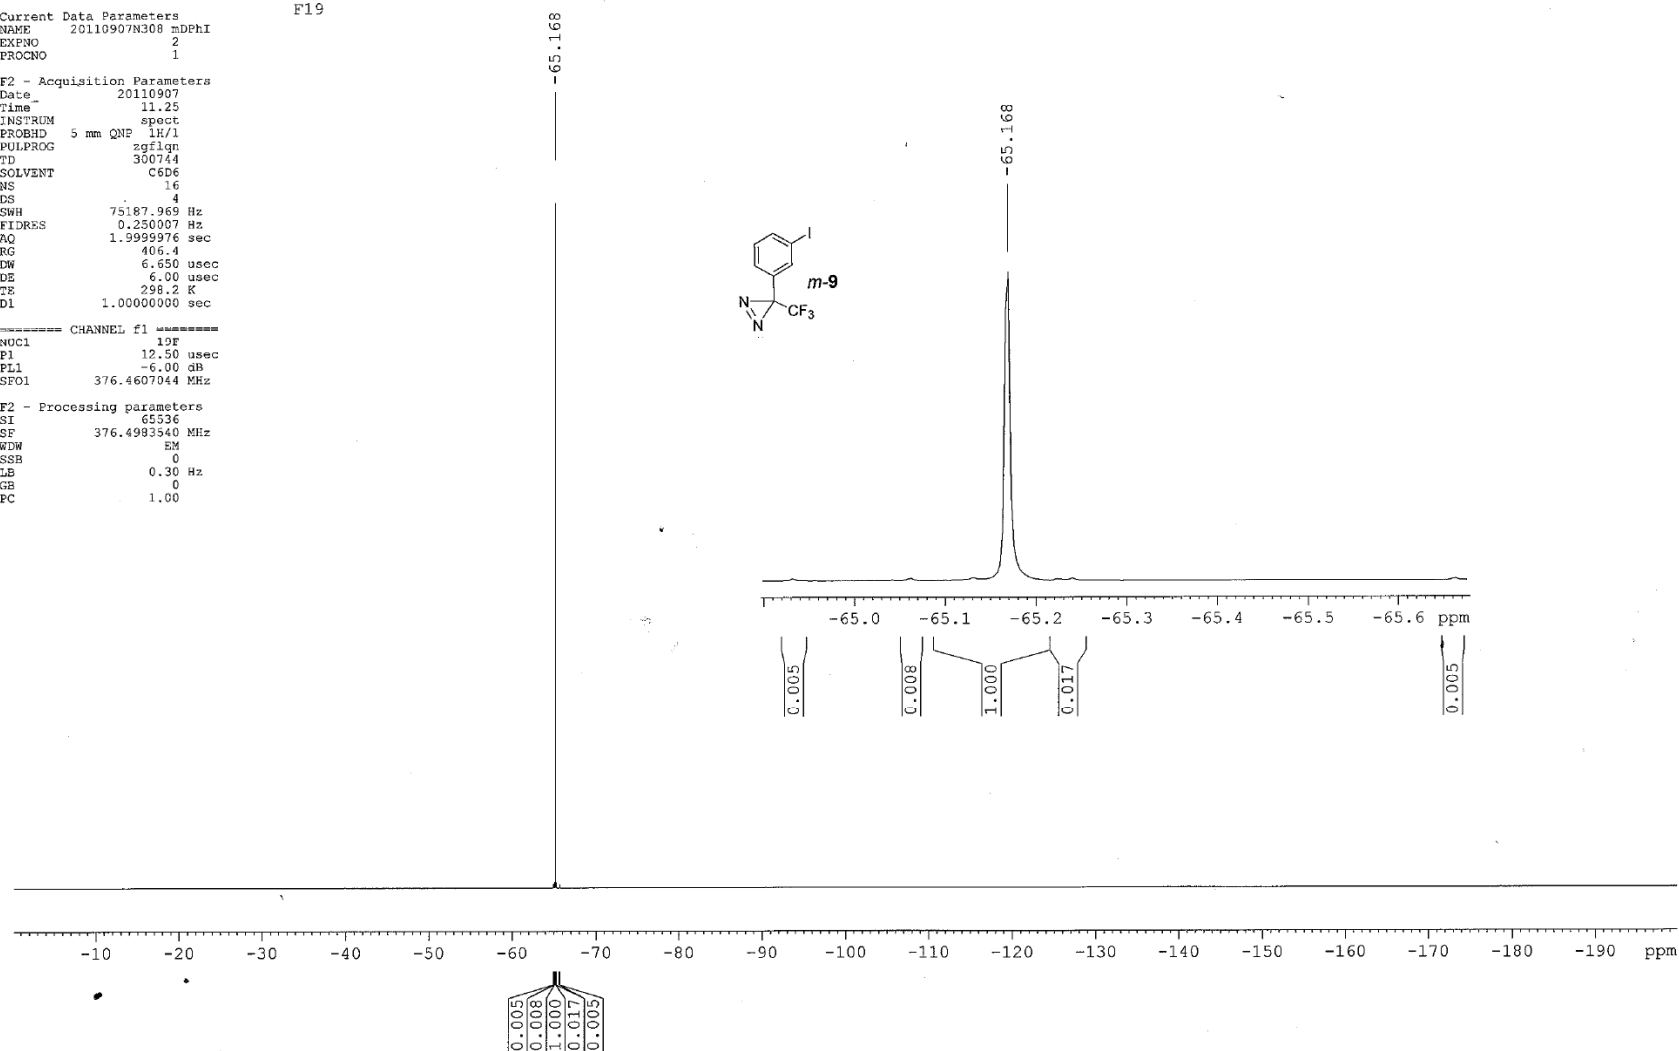

Current Data Parameters  
 NAME 20110125S0214 p1PhCN2CF3  
 EXPNO 1  
 PROCNO 1

F2 - Acquisition Parameters  
 Date\_ 20110125  
 Time 10:31  
 INSTRUM spect  
 PROBED 5 mm PARBO BB-  
 PULPROG zg30  
 TD 65536  
 SOLVENT CDCl3  
 NS 8  
 DS 2  
 SWH 8278.146 Hz  
 FIDRES 0.126314 Hz  
 AQ 3.9564243 sec  
 RG 32  
 DW 60.400 usec  
 DE 6.00 usec  
 TE 297.5 K  
 D1 1.00000000 sec  
 MCREST 0.00000000 sec  
 MCNKK 0.01500000 sec

\*\*\*\*\* CHANNEL f1 \*\*\*\*\*  
 NUC1 1H  
 P1 12.25 usec  
 PL1 -2.00 dB  
 SFO1 400.1424112 MHz

F2 - Processing parameters  
 SI 32768  
 SP 400.1700000 MHz  
 WDW EM  
 SSB 0  
 LB 0.30 Hz  
 GB 0  
 PC 1.00

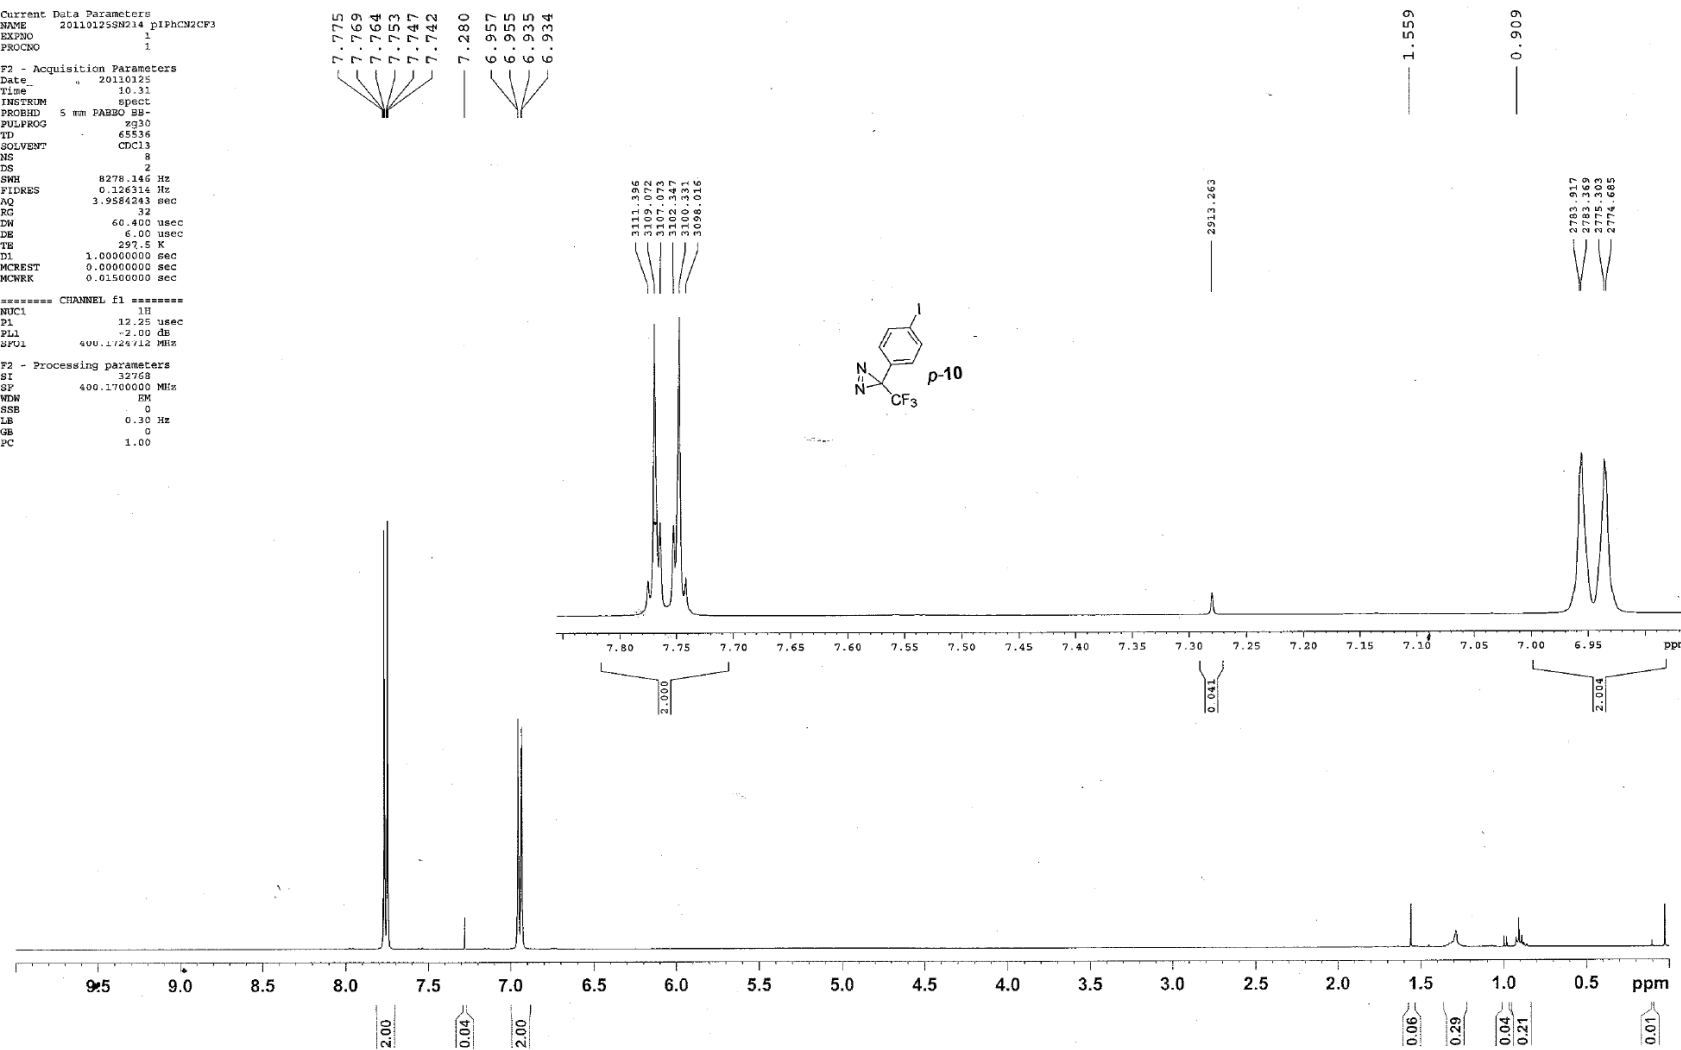

Current Data Parameters  
 NAME 20110125SN214 p1PhCN2CF3  
 EXPNO 2  
 PROCNO 1

F2 - Acquisition Parameters  
 Date 20110125  
 Time 12.28  
 INSTRUM spect  
 PROBRD 5 mm PABBO BB-  
 PULPROG zgpg30  
 TD 65536  
 SOLVENT CDCl3  
 NS 1934  
 DS 4  
 SWH 23980.814 Hz  
 FIDRES 0.365918 Hz  
 AQ 1.3664756 sec  
 RG 1290.2  
 DW 20.850 usec  
 DE 6.00 usec  
 TE 297.9 K  
 DL 2.00000000 sec  
 d11 0.03000000 sec  
 DELTA 1.89999998 sec  
 MCNRET 0.00000000 sec  
 MCNREK 0.01800000 sec

===== CHANNEL f1 =====  
 NUC1 13C  
 PL 9.50 usec  
 PL1 -2.00 dB  
 SFO1 100.628888 MHz

===== CHANNEL f2 =====  
 CPDPRG2 waltz16  
 NUC2 1H  
 PCDP2 80.00 usec  
 PL2 -2.00 dB  
 PL12 14.30 dB  
 PL13 14.00 dB  
 SFO2 400.1716007 MHz

F2 - Processing parameters  
 SI 32768  
 SF 100.6228270 MHz  
 NW 18.00 MHz  
 SSB 0  
 GB 0  
 PC 1.40

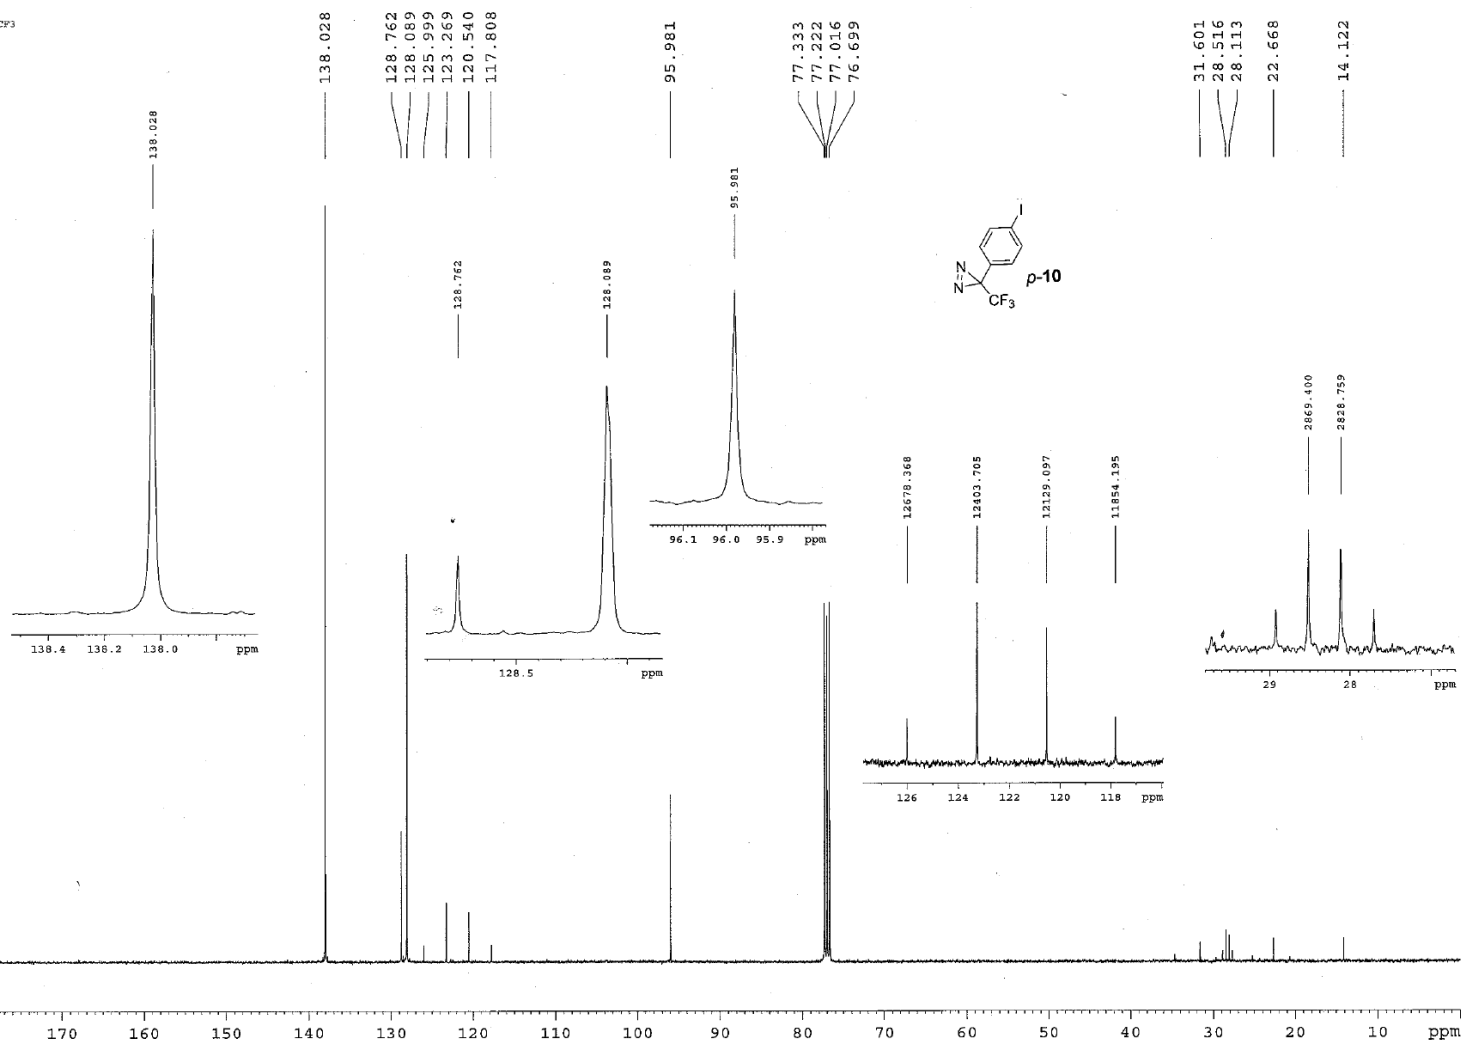

Current Data Parameters  
NAME 2011012402160169 p1PNCN2C13  
EXPNO 2  
PROCNO 1  
F2 - Acquisition Parameters  
Date\_ 20110124  
Time 18.00  
INSTRUM spect  
PROBHD 5 mm QNP 1H/1  
PULPROG zgpg30  
TD 311522  
SOLVENT C6D6  
NS 16  
DS 4  
SWH 75187.969 Hz  
FIDRES 0.241337 Hz  
AQ 2.0716712 sec  
RG 512  
DM 6.650 usec  
DE 6.00 usec  
TE 298.2 K  
D1 1.0000000 sec  
===== CHANNEL f1 =====  
NUC1 13C  
P1 12.50 usec  
PL1 -6.00 dB  
FREQ1 376.4607044 MHz  
F2 - Processing parameters  
SI 65536  
SF 376.4982940 MHz  
WDW EM  
SSB 0  
LB 0.30 Hz  
GB 0  
PC 1.00

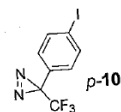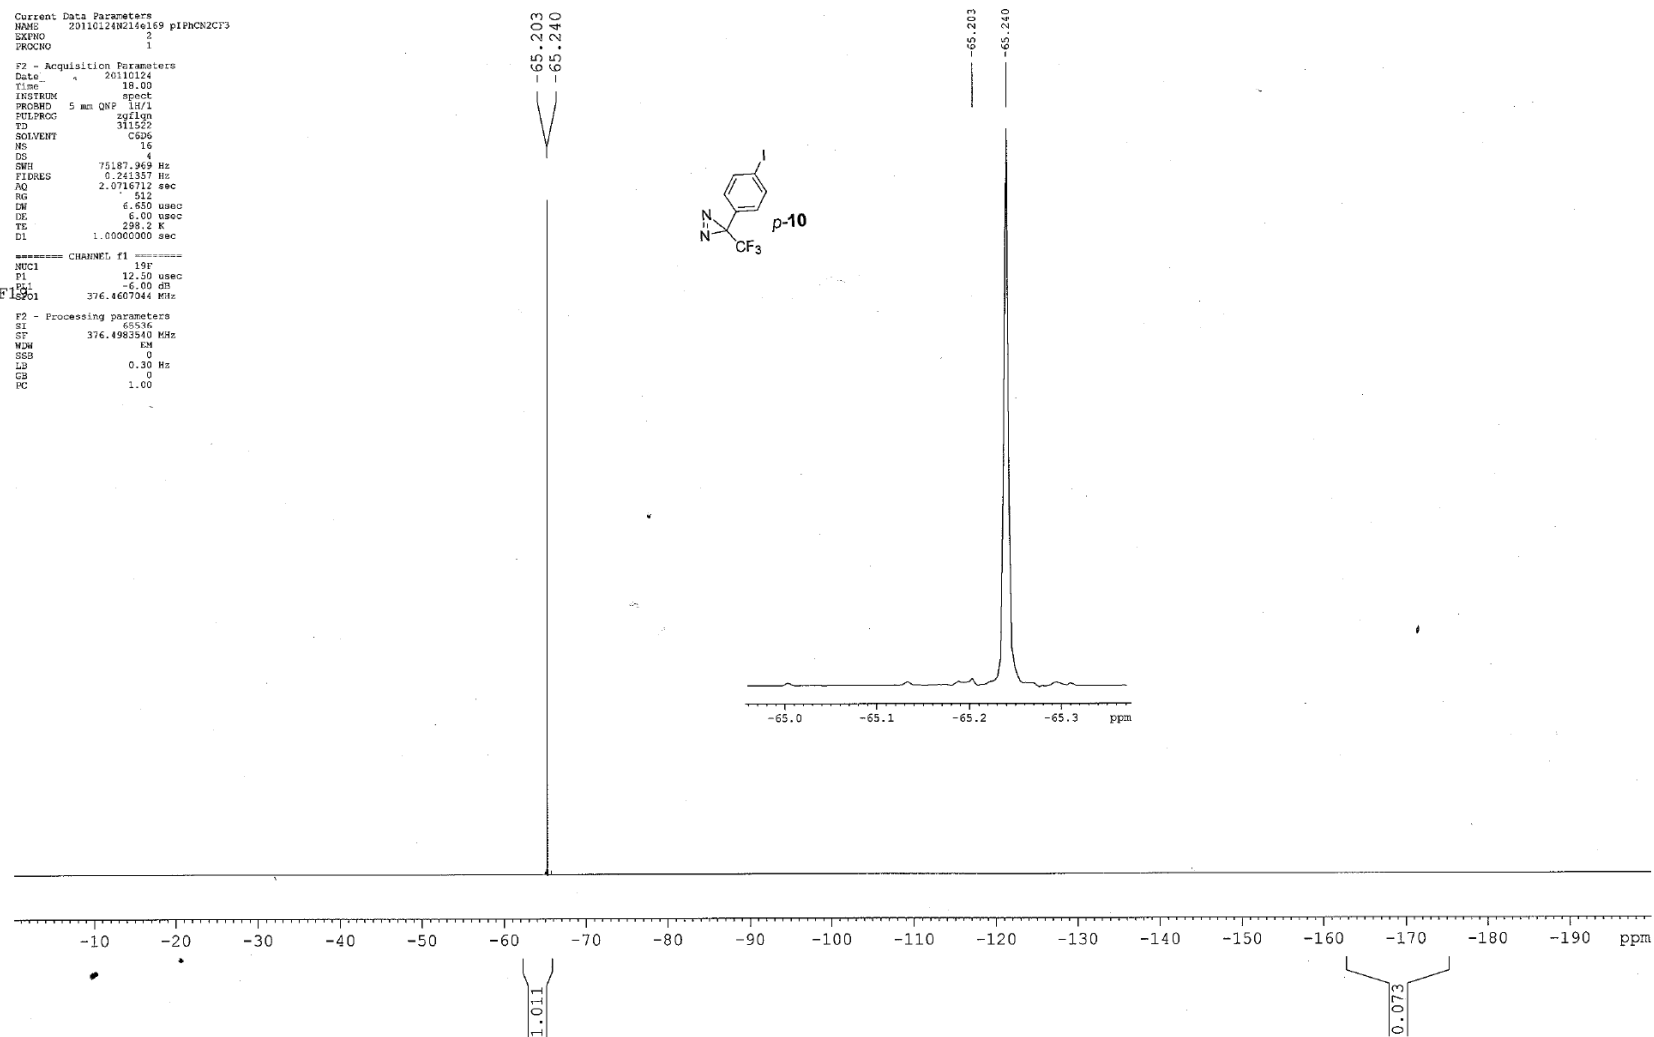





Current Data Parameters  
 NAME 20110317N242e194mbiaz1+pMeO maj  
 EXPNO 3  
 PROCNO 1

## F2 - Acquisition Parameters

Date 20110317  
 Time 12.54  
 INSTRUM spect  
 PROBRD 5 mm QNP 1H/1  
 PULPROG zgpg30  
 ID 65536  
 SOLVENT CDCl3  
 NS 362  
 DS 4  
 SWH 23980.814 Hz  
 FIDRES 0.365918 Hz  
 AQ 1.3664756 sec  
 RG 2048  
 DW 20.850 usec  
 DE 6.00 usec  
 TE 298.2 K  
 D1 2.00000000 sec  
 d11 0.03000000 sec  
 DELTA 1.89999998 sec  
 MCREST 0.00000000 sec  
 MCWRR 0.01500000 sec

CHANNEL f1 -----  
 NUC1 13C  
 P1 10.00 usec  
 PL1 -3.00 dB  
 SFO1 100.6228298 MHz

CHANNEL f2 -----  
 CPDPRG2 waltz16  
 NUC2 1H  
 PCPD2 80.00 usec  
 PT2 0.00 dB  
 PL12 17.00 dB  
 PL13 17.00 dB  
 SFO2 400.1316005 MHz

F2 - Processing parameters  
 SI 32768  
 SF 100.6127690 MHz  
 WDW EM  
 SSB 0  
 LB 1.00 Hz  
 GB 0  
 PC 1.40

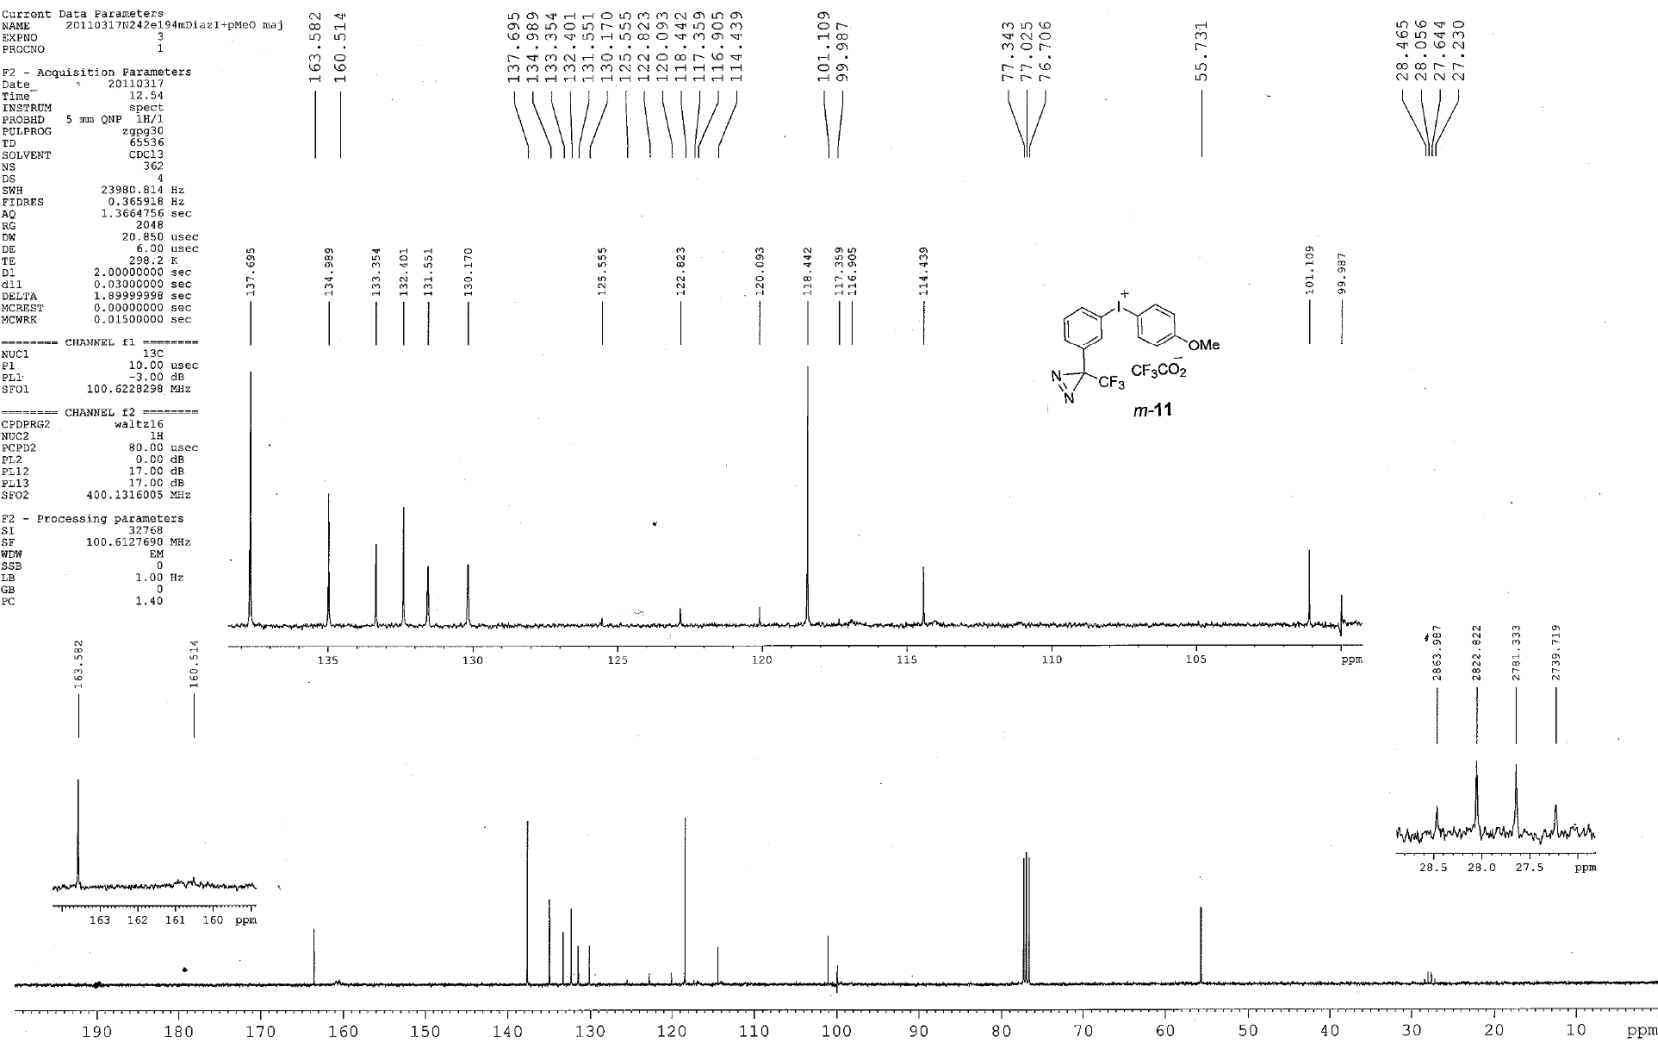

F19

Current Data Parameters  
 NAME 20110317N242e19mDiazI+pMeO maj  
 EXPNO 2  
 PROCNO 1

F2 - Acquisition Parameters  
 Date\_ 20110317  
 Time 12.29  
 INSTRUM spect  
 PROBRD 5 mm QNP 1H/1  
 PULPROG zgpg30  
 TD 451120  
 SOLVENT C6D6  
 NS 16  
 DS 4  
 SWH 75187.969 Hz  
 FIDRES 0.166670 Hz  
 AQ 2.9999981 sec  
 RG 362  
 DW 6.650 usec  
 DE 6.00 usec  
 TE 298.2 K  
 D1 1.00000000 sec

===== CHANNEL f1 =====  
 NUC1 19F  
 P1 12.50 usec  
 PL1 -6.00 dB  
 SFO1 376.4607044 MHz

F2 - Processing parameters  
 SI 65536  
 SF 376.4983540 MHz  
 WDW EM  
 SSB 0  
 LB 0.30 Hz  
 GB 0  
 PC 1.00

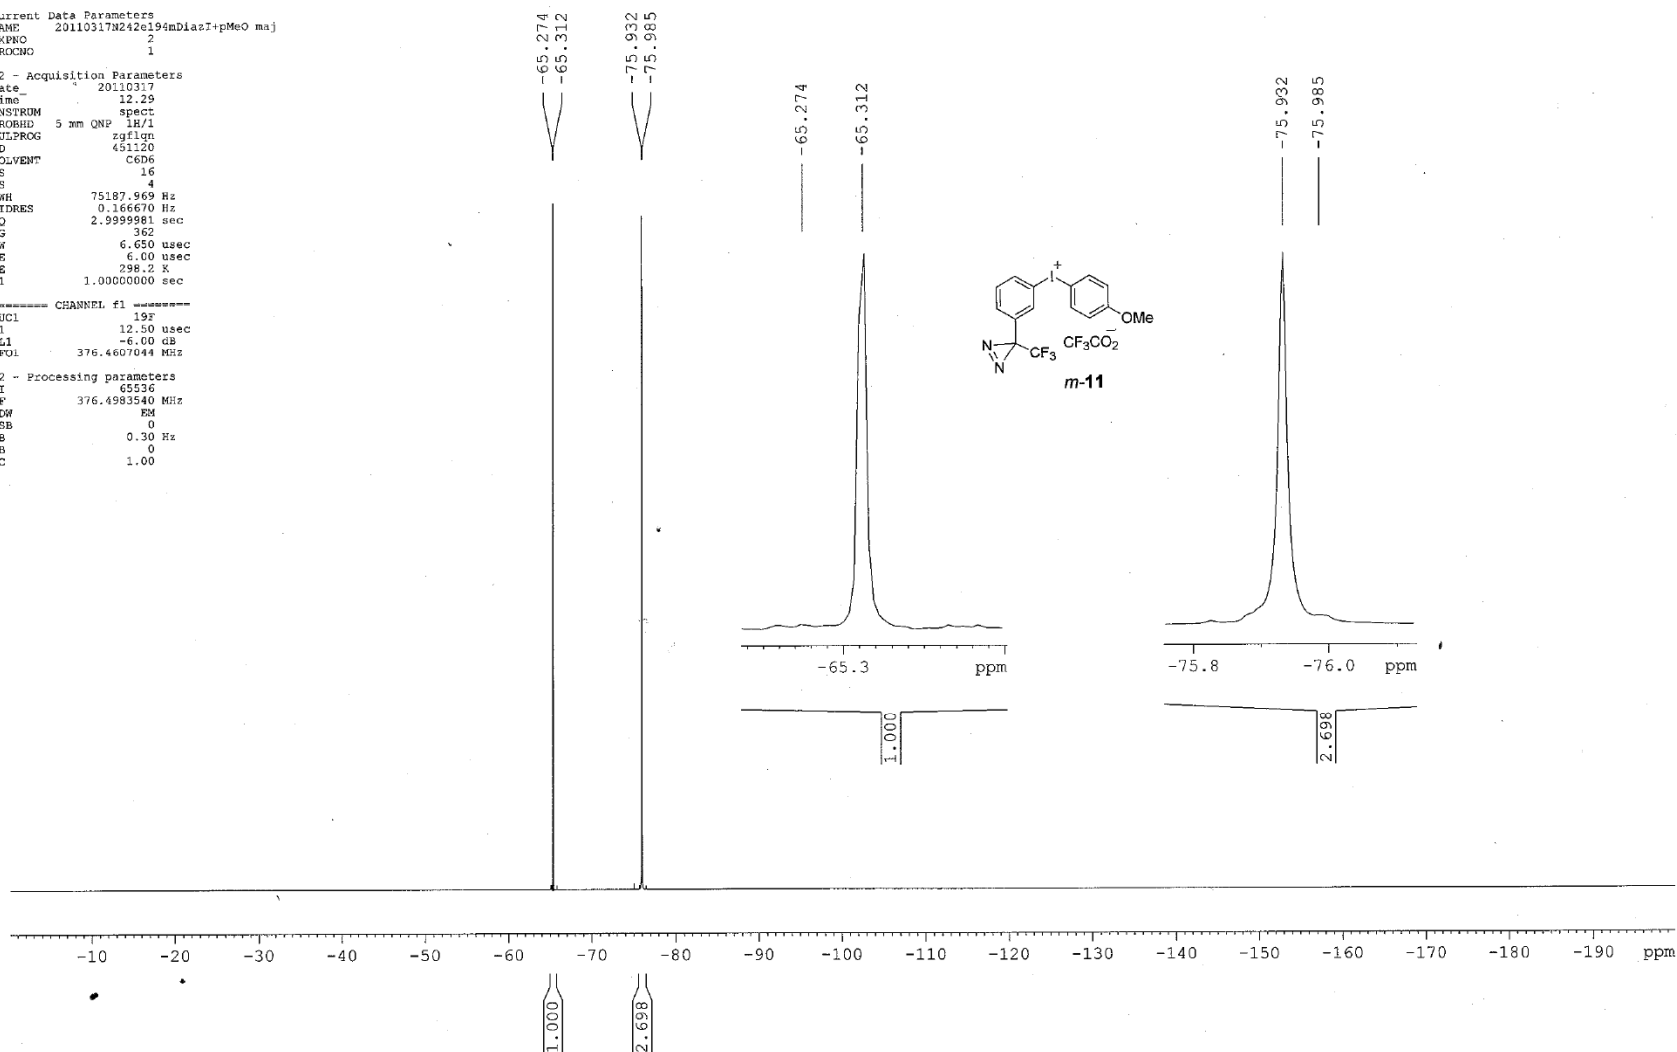

Current Data Parameters  
 NAME 20110506N276e213 pDiazil-pMeO  
 EXPNO 1  
 PROCNO 1

F2 - Acquisition Parameters  
 Date\_ 20110506  
 Time 15.27  
 INSTRUM spect  
 PROBHD 5 mm QNP 1H/1  
 PULPROG zgpg30  
 TD 65536  
 SOLVENT CDCl3  
 NS 16  
 DS 2  
 SWH 8279.146 Hz  
 FIDRES 0.126314 Hz  
 AQ 3.9584243 sec  
 RG 362  
 DW 60.400 usec  
 DE 6.00 usec  
 TE 299.2 K  
 D1 1.00000000 sec  
 D11 0.00000000 sec  
 MCREST 0.01500000 sec  
 MCHRG 0.01500000 sec

===== CHANNEL f1 =====  
 NUC1 1H  
 P1 12.00 usec  
 PL1 0.00 dB  
 SFO1 400.1324710 MHz  
 F2 - Processing parameters  
 SI 32768  
 SF 400.1300000 MHz  
 WDW EM  
 SSB 0  
 LB 0.30 Hz  
 GB 0  
 PC 1.00

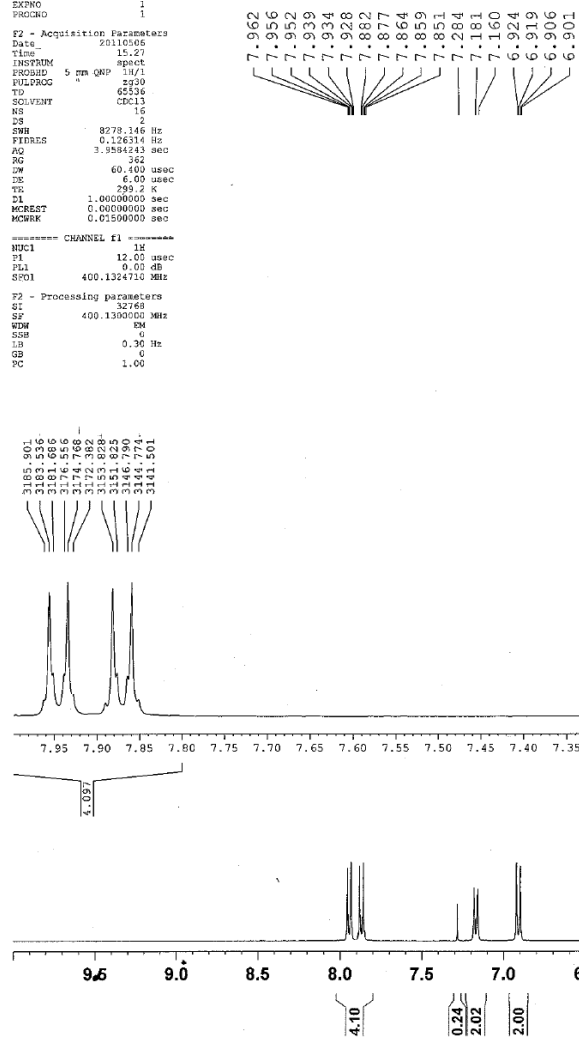

```

F2 - Acquisition Parameters
Date_      20110517
Time_      19.23
INSTRUM    spect
PROBHD     5 mm QNP 1H/1
PULPROG    zgpg30
TD          65536
SOLVENT    CDCl3
NS          16233
DS          4
SWH         23980.814 Hz
FIDRES     0.365918 Hz
AQ         1.3664756 sec
RG         1149.4
DW         20.850 usec
DE         6.60 usec
TE         295.2 K
D1         2.00000000 sec
d11        0.03000000 sec
DELTA      1.89399998 sec
MCKRST     0.00000000 sec
MKRKR      0.01500000 sec

```

```

===== CHANNEL f1 =====
NUC1      13C
P1         10.00 usec
PL1        -3.00 dB
SF01      100.6228298 MHz

```

```

***** CHANNEL #2 *****
CPDPRG2          waltz16
NUC2              1H
PCPD2            80.00 usec
PL2              0.00 dB
PL12             17.00 dB
PL13             17.00 dB
SFO2            400.1316005 MHz

```

```
F2 - Processing parameters
SI              32768
SF              100.6127690 MHz
WDW             EM
SSB             0
LB              1.00 Hz
GB              0
PC              1.40
```

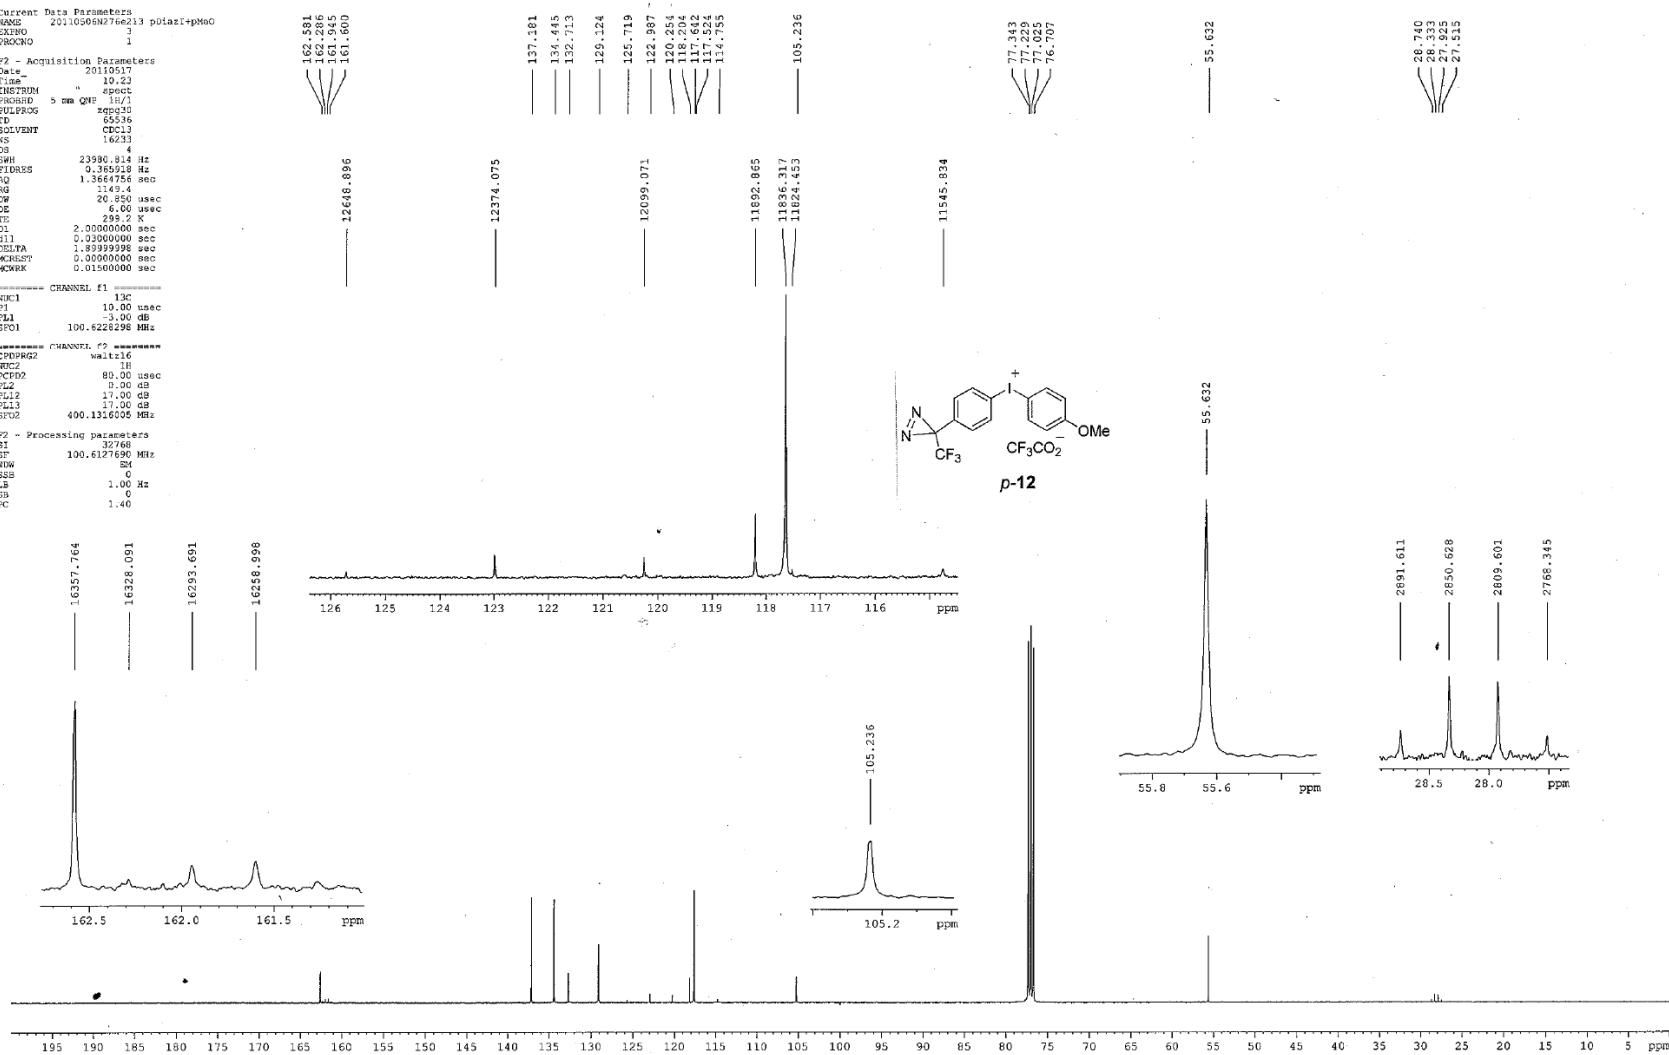

Current Data Parameters  
NAME 20110506N276e213 pDiazI-pMeO  
EXPNO 4  
PROCNO 1

F2 - Acquisition Parameters  
Date\_ 20110517  
Time\_ 10.40  
INSTRUM spect  
PROBHD 5 mm QNP 1H/1  
PULPROG zgpg30  
TD 300744  
SOLVENT C6D6  
NS 64  
DS 4  
SWH 75187.569 Hz  
FIDRES 0.256007 Hz  
AQ 1.9999976 sec  
RG 812.7  
DW 6.650 usec  
DE 6.00 usec  
TE 299.2 K  
D1 1.00000000 sec

===== CHANNEL f1 =====  
NUC1 19F  
P1 12.50 usec  
PL1 -6.00 dB  
SFO1 376.4607044 MHz

F2 - Processing parameters  
SI 65536  
SF 376.4963540 MHz  
WDW EM  
SSB 0  
LB 0.30 Hz  
GB 0  
PC 1.00

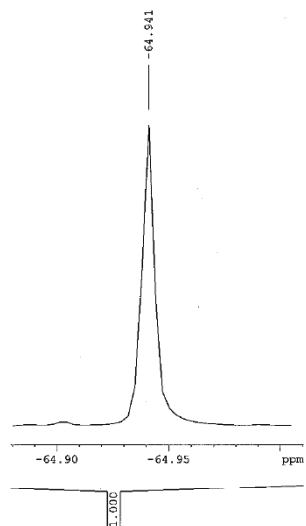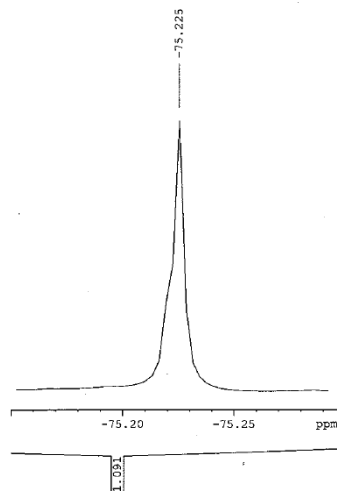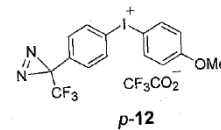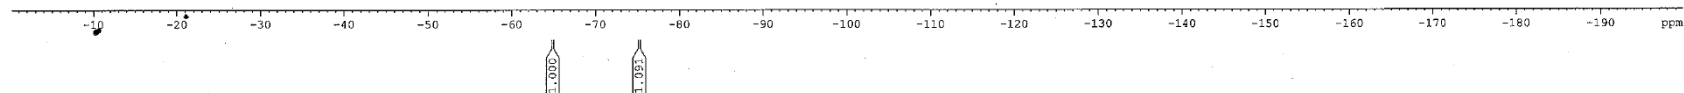

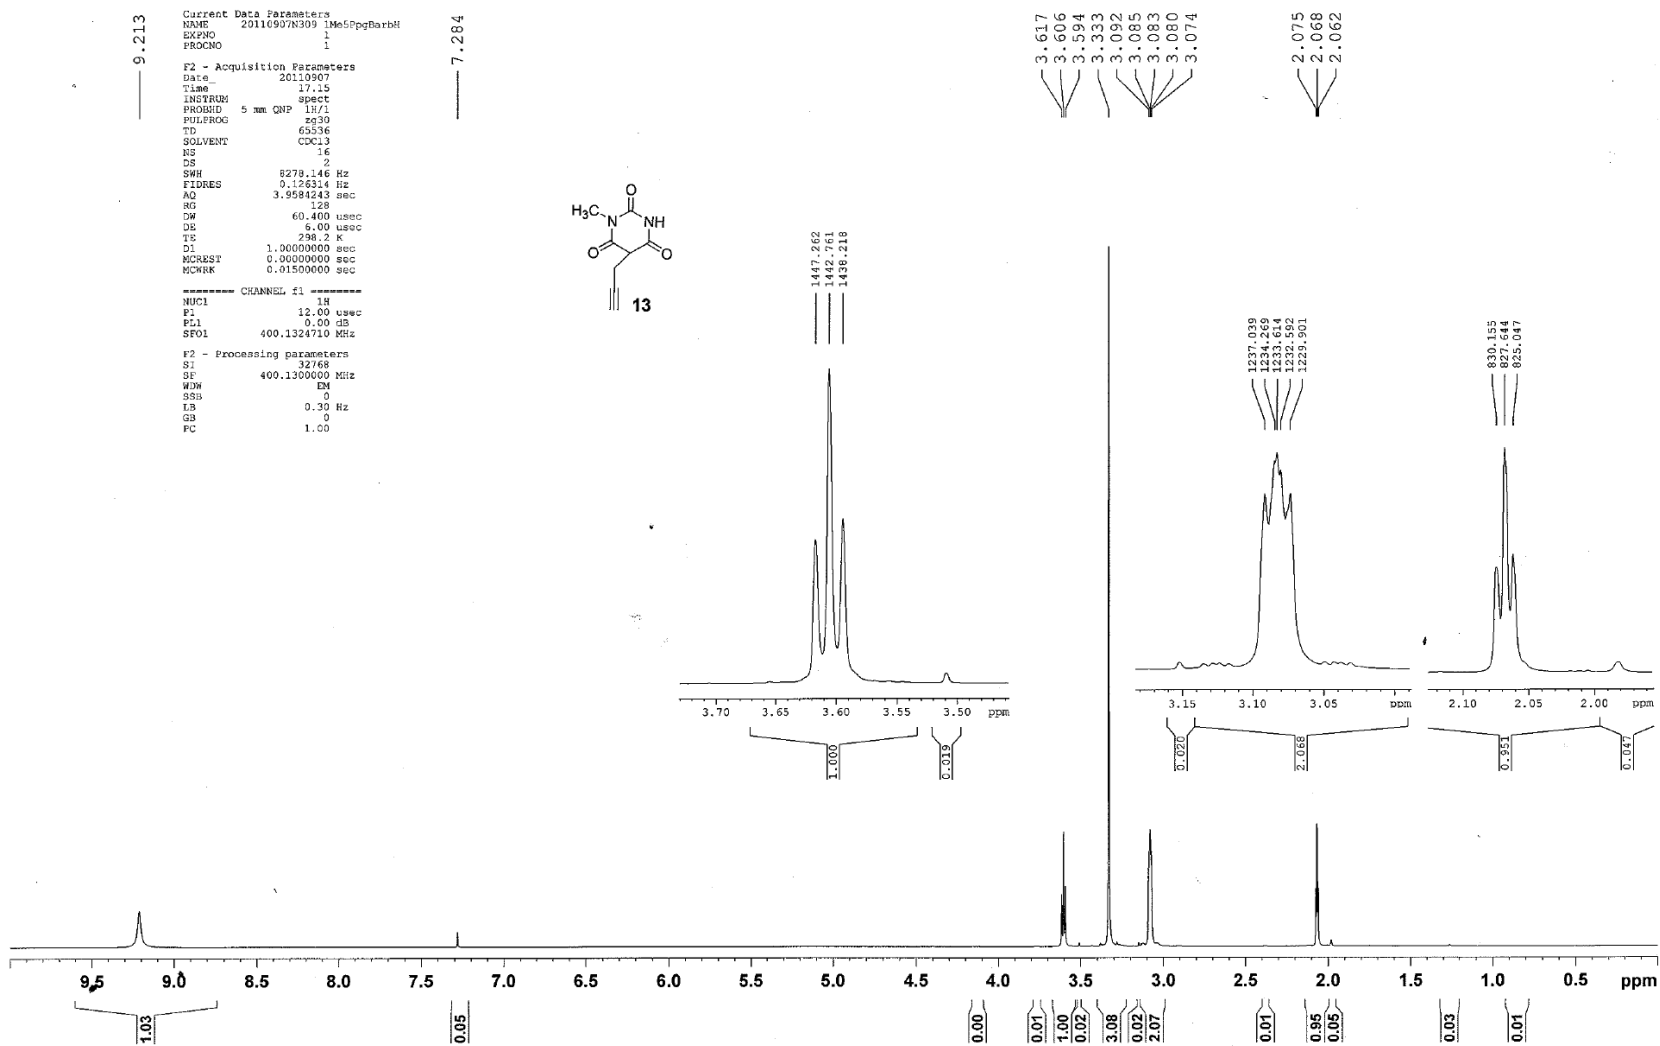

Current Data Parameters  
 NAME 20110907N309 1Me5ppggharbH  
 EXPNO 2  
 PROCNO 1

F2 - Acquisition Parameters  
 Date\_ 20110907  
 Time 17.31  
 INSTRUM spect  
 PROBHD 5 mm QNP 1H/1  
 PULPROG zgpg30  
 TD 65536  
 SOLVENT CDCl3  
 NS 513  
 DS 4  
 SWH 23980.814 Hz  
 FIDRES 0.365818 Hz  
 AQ 1.3664756 sec  
 RG 724.1  
 DR 20.850 usec  
 DE 6.00 usec  
 TE 299.2 K  
 D1 2.00000000 sec  
 d11 0.03000000 sec  
 DELTA 1.89999998 sec  
 NUCREST 0.00000000 sec  
 NUCR1 0.01500000 sec

===== CHANNEL f1 =====  
 NUC1 13C  
 P1 10.00 usec  
 PL1 -3.00 dB  
 SFO1 100.628298 MHz

===== CHANNEL f2 =====  
 CPDPRG2 waltz16  
 NUC2 1H  
 PCPD2 80.00 usec  
 PL2 0.00 dB  
 PL12 17.00 dB  
 PL13 17.00 dB  
 SFO2 400.1316005 MHz

F2 - Processing parameters  
 SI 32768  
 SF 300.6127690 MHz  
 WDW EM  
 SSB 0  
 LB 1.00 Hz  
 GB 0  
 PC 1.40

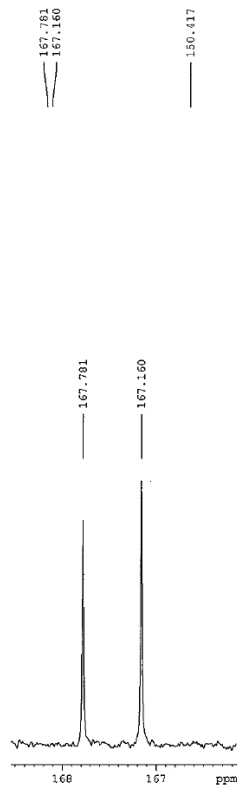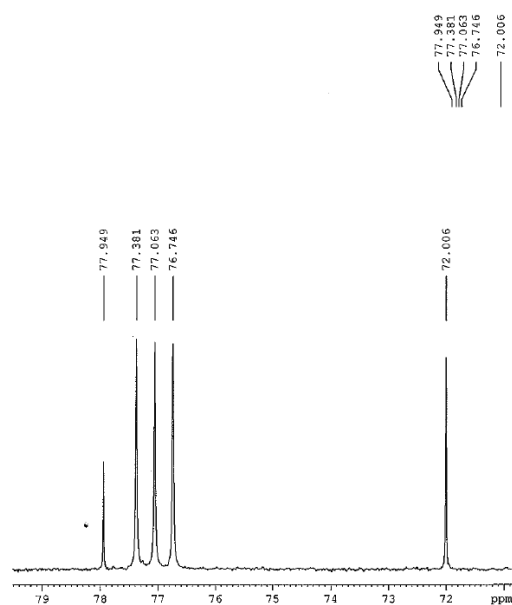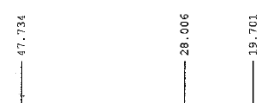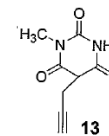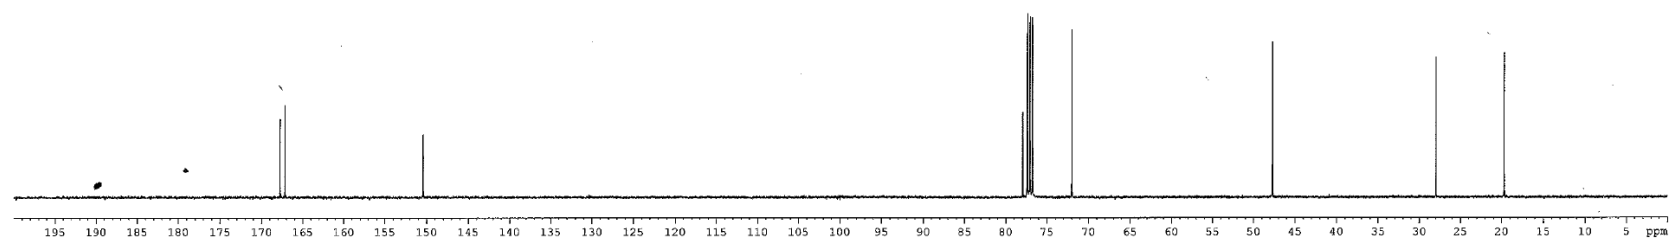



Current Data Parameters  
NAME: 20120707SCH07 aDBarball rac pur  
EXPNO: 1  
PROCNO: 1

F2 - Acquisition Parameters  
Date\_: 20120707  
Time: 14.12  
INSTRUM: spect  
PROBHD: 5 mm QNP 1H/1  
PULPROG: zgpg30  
TD: 65536  
SOLVENT: CDCl3  
NS: 16  
DS: 4  
SWH: 5278.146 Hz  
FIDRES: 0.126214 Hz  
AQ: 3.538421 sec  
RG: 512  
RW: 60.430 usec  
DE: 6.00 usec  
TE: 299.2 K  
D1: 1.00000000 sec  
MCOREST: 0.00000000 sec  
MCORE: 0.01500000 sec

CHANNEL f1  
NUC1: 1H  
P1: 12.00 usec  
PL1: 0.00 dB  
SFO1: 400.1324710 MHz

F2 - Processing parameters  
SI: 32768  
SF: 400.1300000 MHz  
WDW: EM  
SSB: 0  
GB: 0  
PC: 1.00

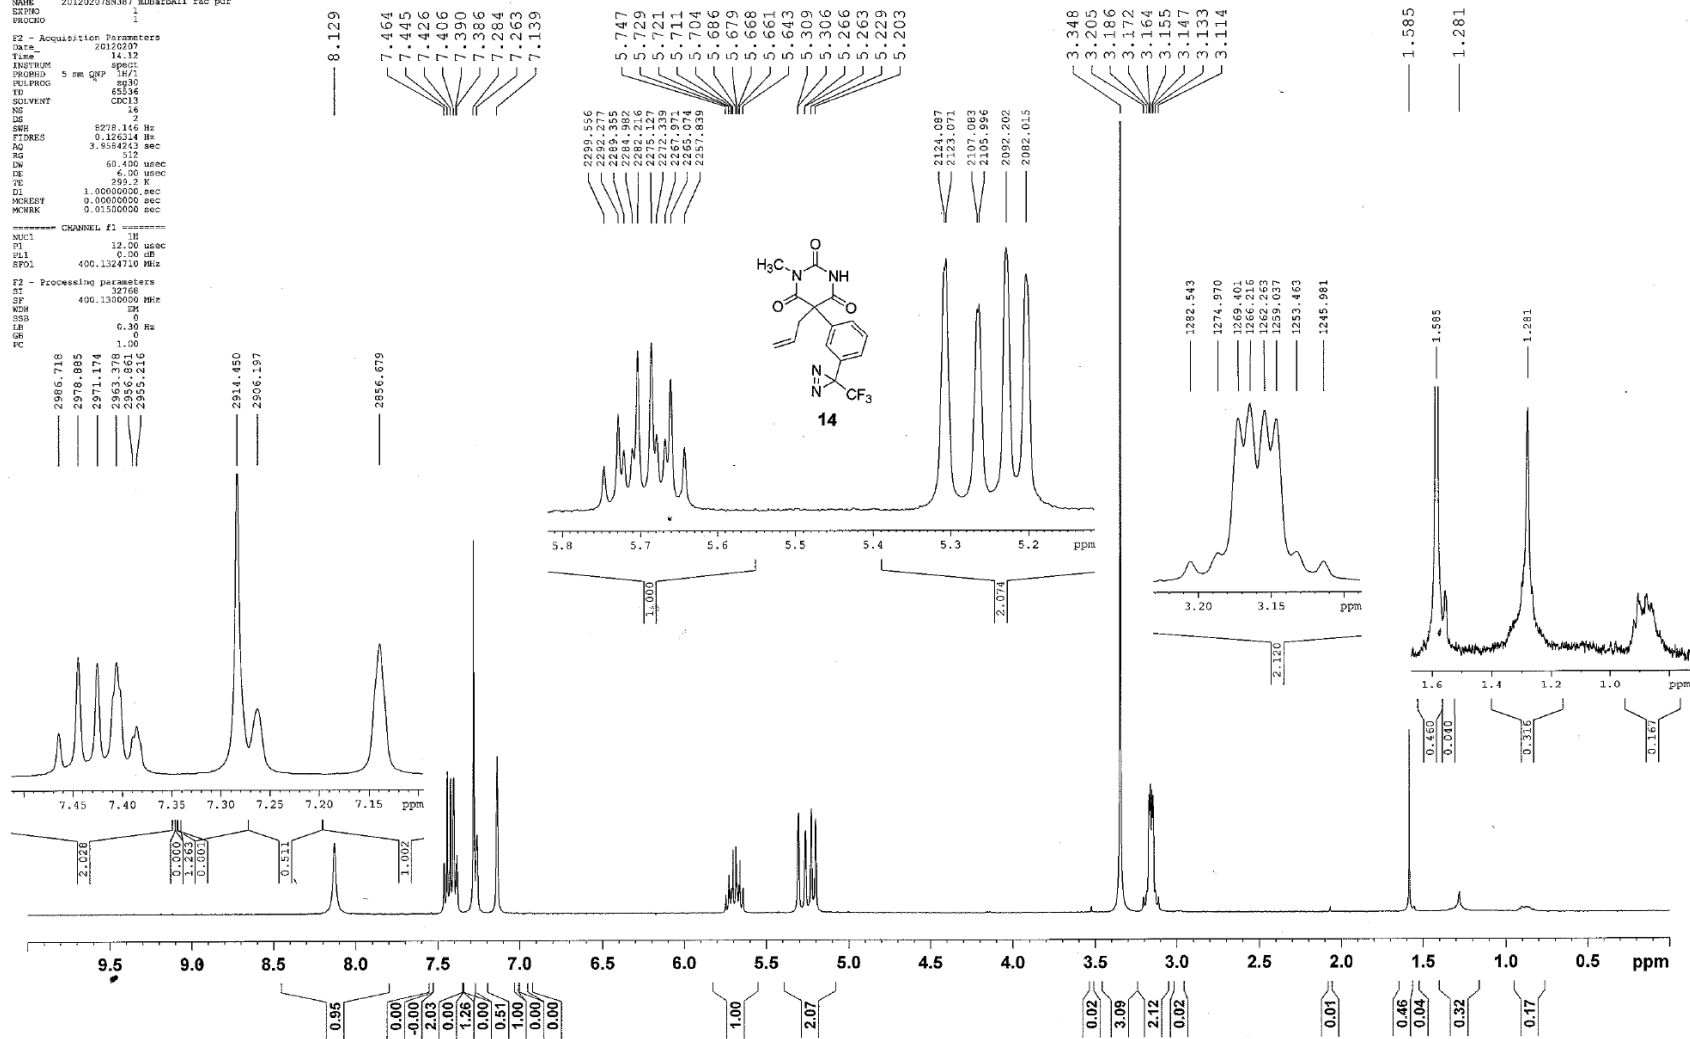

Current Data Parameters  
 NAME 20110329M1508arbdiaz repur  
 EXPNO 3  
 PROCNO 1

F2 - Acquisition Parameters  
 Date\_ 20110330  
 Time\_ 7.33  
 INSTRUM spect  
 PROBRD 5 mm QNP 1H/1  
 PULPROG zgpg30  
 TD 23904  
 SOLVENT CDCl3  
 NS 6144  
 DS 4  
 SWH 23980.814 Hz  
 FIDRES 0.100002 Hz  
 AQ 4.9999633 sec  
 RG 812.7  
 DW 20.850 usec  
 DE 6.00 usec  
 TE 298.2 K  
 D1 2.0000000 sec  
 d11 0.0300000 sec  
 DELTA 1.89999998 sec  
 MCREST 0.0000000 sec  
 NCMR 0.01500000 sec

===== CHANNEL f1 =====  
 NUC1 13C  
 P1 10.00 usec  
 PL1 -3.00 dB  
 SFO1 100.6228298 MHz

===== CHANNEL f2 =====  
 CPDPRG2 waltz16  
 NUC2 1H  
 PCPD2 80.00 usec  
 PL2 0.00 dB  
 PL12 17.00 dB  
 PL13 17.00 dB  
 SFO2 400.1316005 MHz

F2 - Processing parameters  
 SI 32768  
 SF 100.6127690 MHz  
 WDW no  
 SSB 0  
 LB 0.00 Hz  
 GB 0  
 PC 1.40

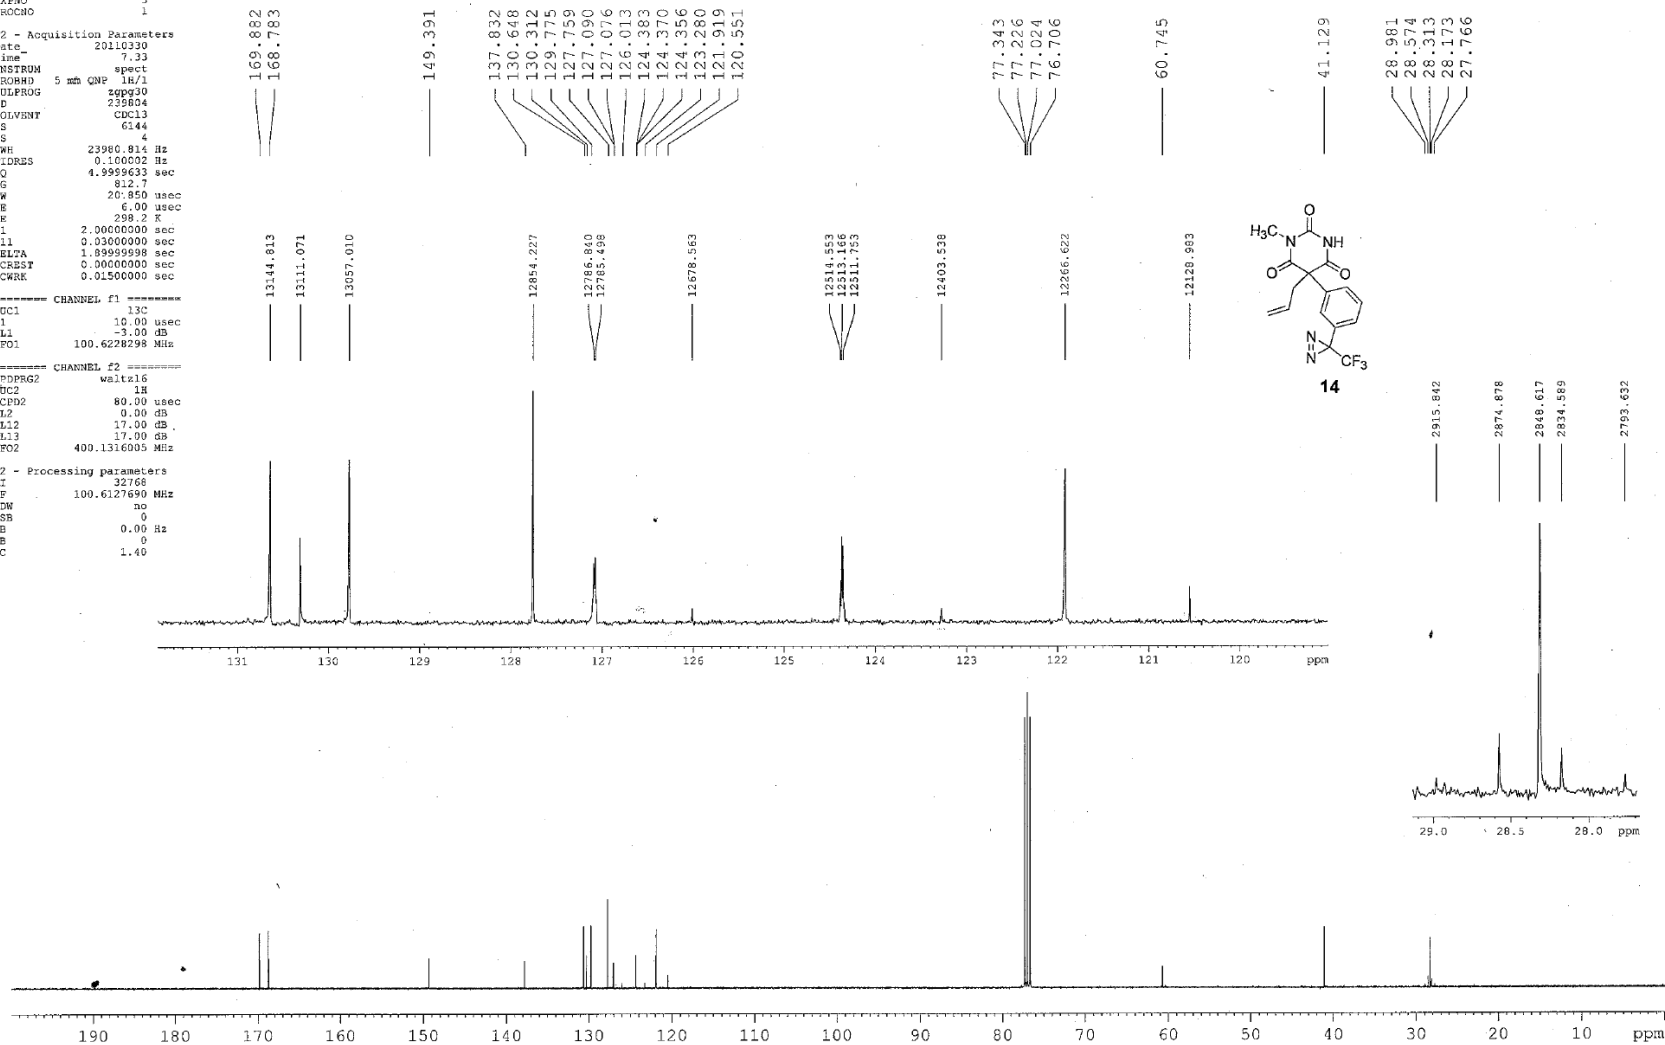

Current Data Parameters  
NAME 20110329N250BarbDiaz repur  
EXPNO 2  
PROCNO 1

F2 - Acquisition Parameters  
Date 20110329  
Time 19.26  
INSTRUM spect  
PROBHD 5 mm QNP 1H/1  
PULPROG zgpg30  
TD 451120  
SOLVENT C6D6  
NS 16  
DS 4  
SWH 75107.969 Hz  
FIDRES 0.166670 Hz  
AQ 2.9999981 sec  
RG 912.3  
DW 6.650 usec  
DE 6.00 usec  
TE 298.2 K  
D1 1.00000000 sec

===== CHANNEL f1 =====  
NUC1 13C  
P1 12.50 usec  
PL1 -6.00 dB  
SFO1 376.4607044 MHz

F2 - Processing parameters  
SI 65536  
SF 376.4983540 MHz  
WDW EM  
SSB 0  
LB 0.30 Hz  
GB 0  
PC 1.00

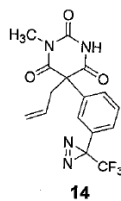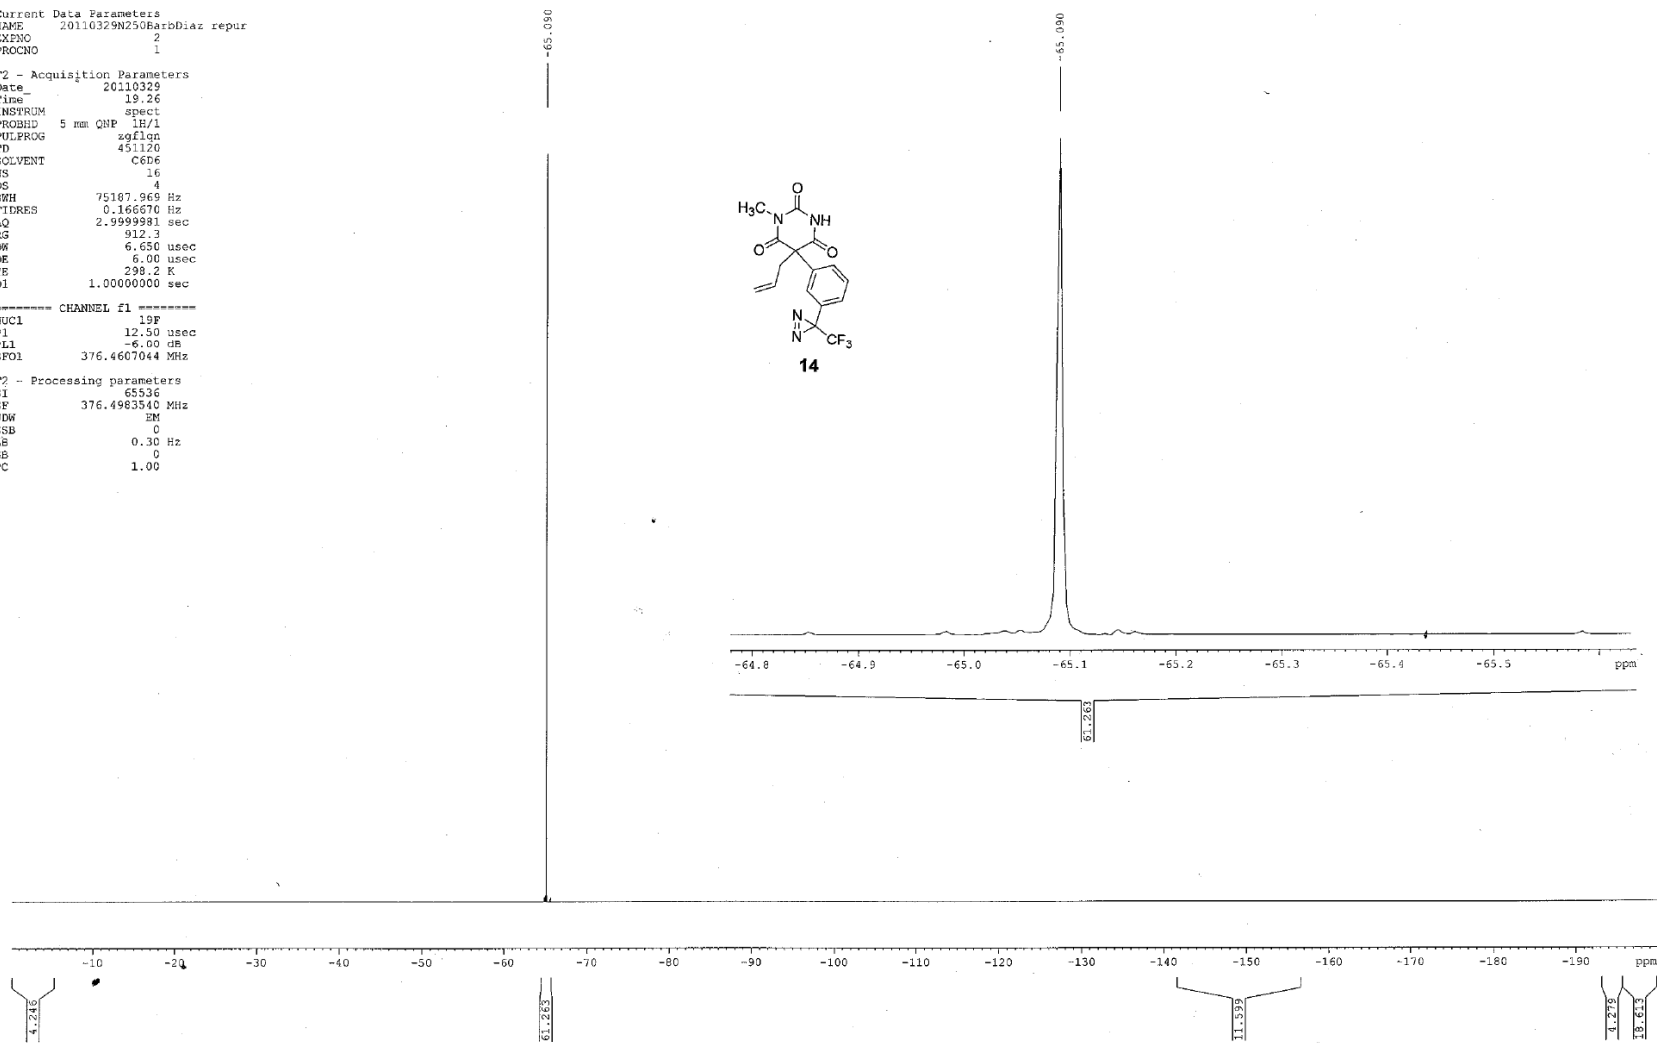

Current Data Parameters  
NAME 20110503M0271a209 PpgBarb-m01az  
EXPNO 1  
PROCNO 1

F2 - Acquisition Parameters  
Date\_ 20110503  
Time 12.40  
INSTRUM spect  
PROBHD 5 mm BBOBO MM-  
PULPROG zgpg30  
TD 65536  
SOLVENT CCl<sub>4</sub>  
NS 16  
DS 2  
SWH 8278.146 Hz  
FIDRES 0.126314 Hz  
AQ 3.538423 sec  
RG 25.4  
DM 65.400 usec  
DE 6.00 usec  
TE 297.5 K  
D1 1.00000000 sec  
MCREST 0.00000000 sec  
MCWEX 0.01500000 sec

===== CHANNEL f1 =====  
NUC1 <sup>1</sup>H  
P1 12.25 usec  
PL1 -2.00 dB  
SFO1 400.1724713 MHz  
F2 - Processing parameters  
SI 32768  
SF 400.1700000 MHz  
WDW EM  
SSB 0  
LB 0.30 Hz  
GB 0  
PC 1.00

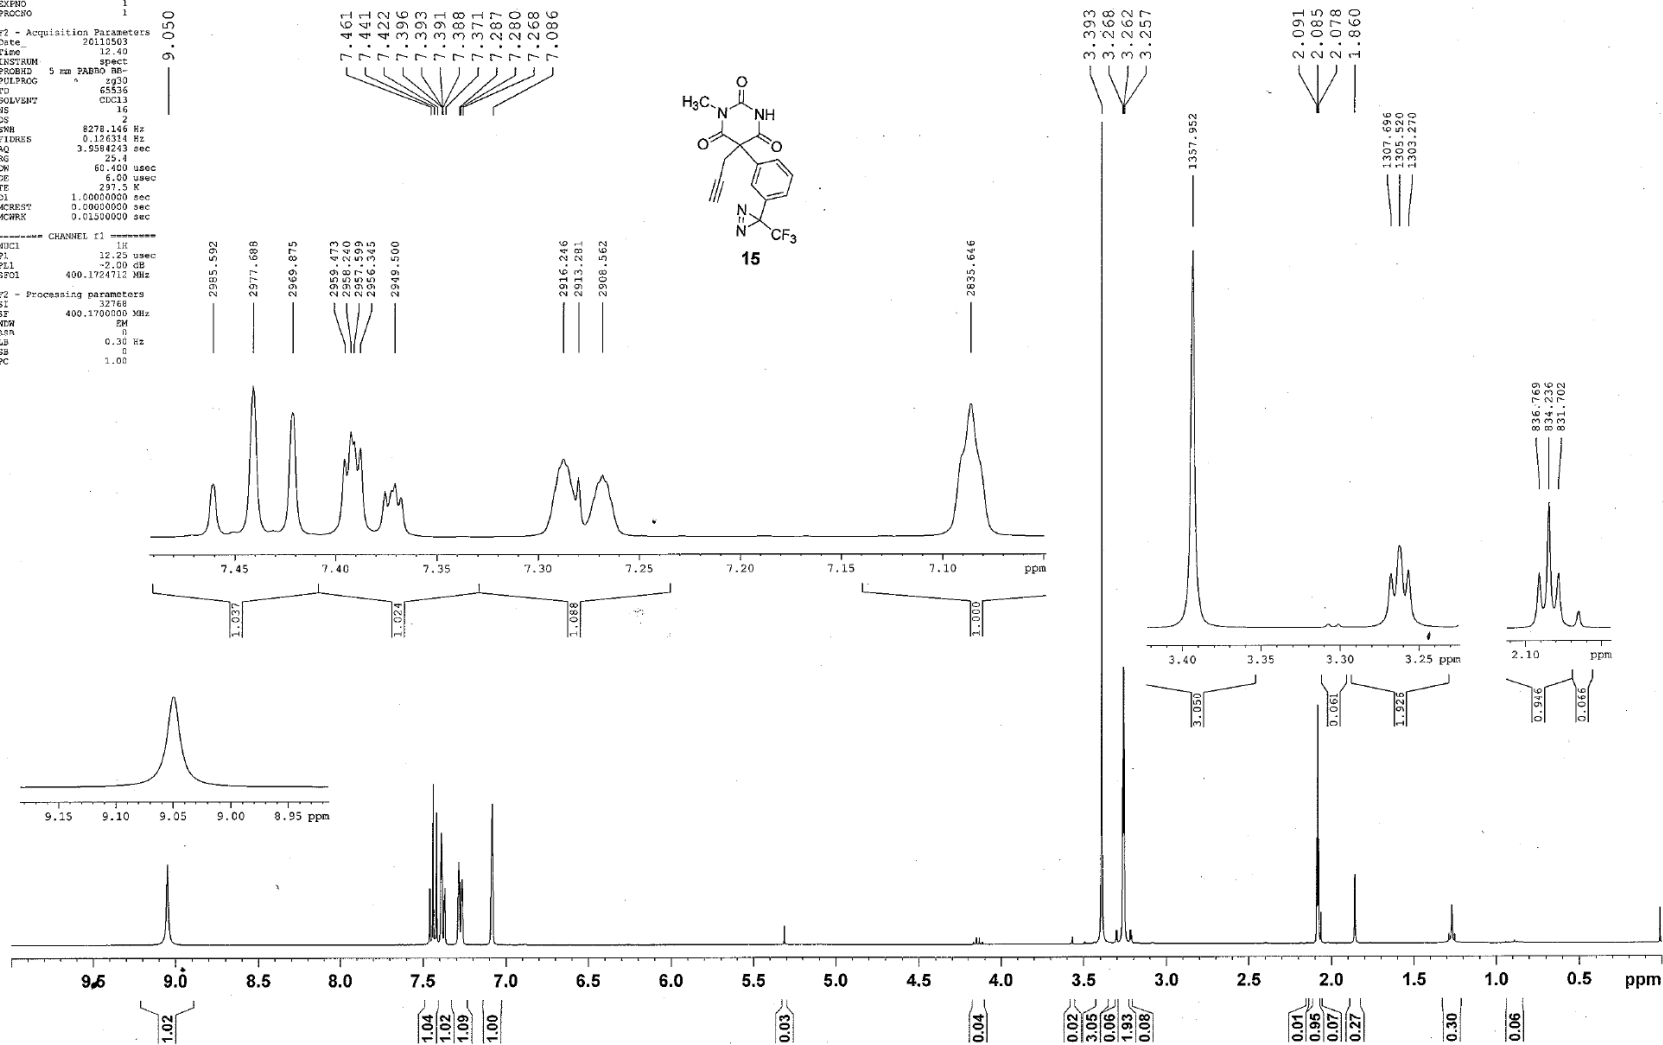

Current Data Parameters  
 NAME 20110518N271a209 MeBarbPpg-mDias  
 EXPNO 2  
 PROCNO 1

F2 - Acquisition Parameters  
 Date\_ 20110518  
 Time 16.04  
 INSTRUM spect  
 PROCNO 5 mm\_QNP 1H/1  
 PULPROG zgpg30  
 TO 65536  
 SOLVENT CDCl3  
 NS 1024  
 DS 4  
 SWH 23980.814 Hz  
 FIDRES 0.3664756 Hz  
 AQ 1.3664756 sec  
 RG 324.1  
 DW 20.850 usec  
 DE 6.00 usec  
 TE 300.2 K  
 D1 2.00000000 sec  
 d11 0.03000000 sec  
 DELTA 1.89999998 sec  
 MCHST 0.00000000 sec  
 MCHW 0.01500000 sec

CHANNEL F1 -----  
 NUC1 13C  
 P1 10.00 usec  
 PL1 -3.00 dB  
 SFO1 100.6228298 MHz

CHANNEL F2 -----  
 CDEPRG2 waltz16  
 NUC2 1H  
 FWD2 80.00 usec  
 PL2 0.00 dB  
 PL12 17.00 dB  
 PL13 17.00 dB  
 SFO2 400.1314005 MHz

F2 - Processing parameters  
 SI 100.6127690 MHz  
 WDW RM  
 SSB 0  
 LB 1.00 Hz  
 GB 0  
 PC 1.40

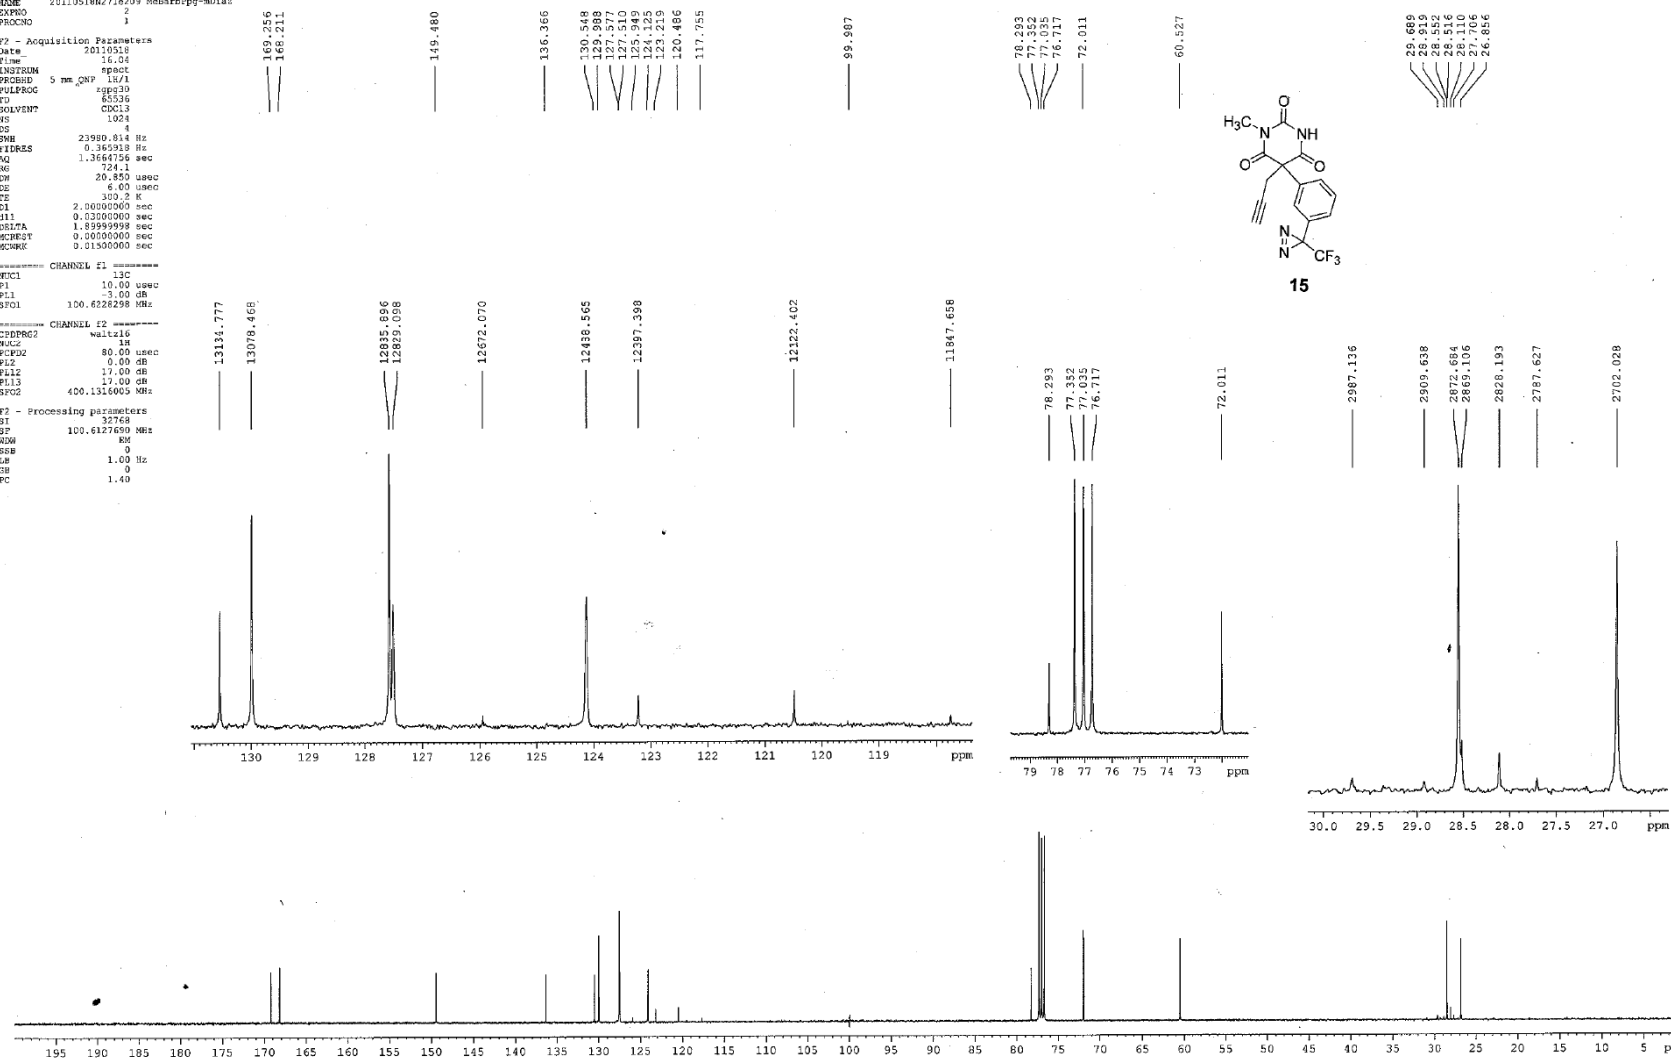

Current Data Parameters  
NAME 201105180271e209 MeBarbPp-mDiaz  
EXPNO 1  
PROCNO 1

F2 - Acquisition Parameters  
Date\_ 20110519  
Time\_ 12.03  
INSTRUM spect  
PROBHD 5 mm QNP 1H/1  
PULPROG zgpg30  
TD 300744  
SOLVENT CDCl3  
NS 16  
DS 4  
SWH 75187.969 Hz  
FIDRES 0.250007 Hz  
AQ 1.9999976 sec  
RG 645.1  
DW 8.650 usec  
DE 5.00 usec  
TE 300.2 K  
D1 1.0000000 sec

===== CHANNEL f1 =====  
NUC1 19F  
P1 12.00 usec  
PL1 -6.00 dB  
SFO1 376.4607044 MHz

F2 - Processing parameters  
SI 65536  
SF 376.4983540 MHz  
WDW EM  
SSB 0  
LB 0.30 Hz  
GB 0  
PC 1.00

-62.906  
-62.922  
-62.938

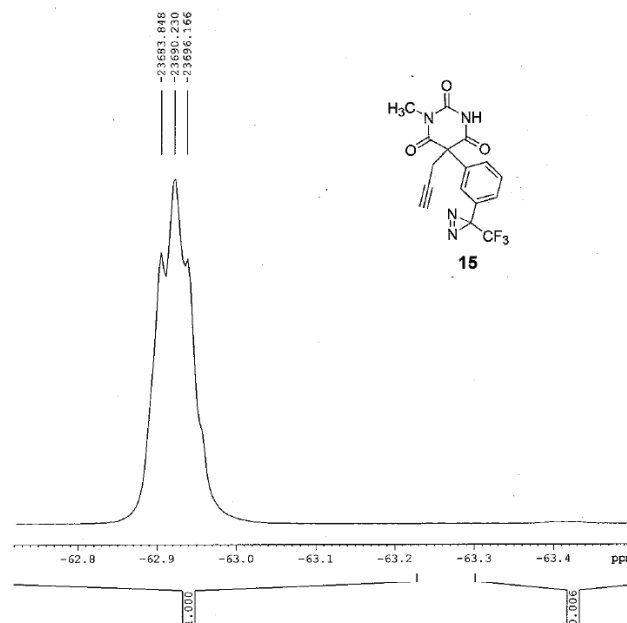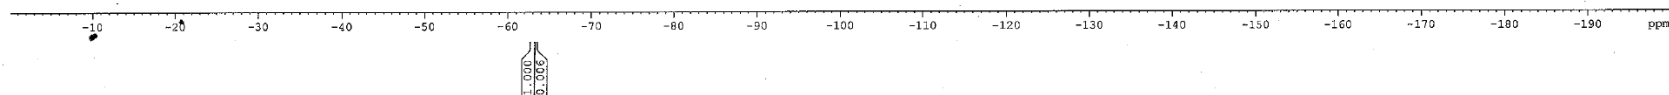



Current Data Parameters  
NAME 201118N349246 mBarbPro  
EXNO 4  
PROCNO 1

F2 - Acquisition Parameters  
Date 20111118  
Time 15.14  
INSTRUM spect  
PROBHD 5 mm QNP 1H/1  
PULPROG zgpg30  
TD 65536  
SOLVENT CDCl3  
NS 1024  
DS 4  
SWH 23980.814 Hz  
FIDRES 0.365918 Hz  
AQ 1.3664756 sec  
RG 724.1  
LW 20.850 usec  
DE 6.00 usec  
TE 299.2 K  
D1 2.00000000 sec  
d11 0.03000000 sec  
DELTA 1.89999998 sec  
MCREST 0.09000000 sec  
MCWRR 0.01500000 sec

CHANNEL F1  
NUC1 13C  
P1 10.00 usec  
PL1 -3.00 dB  
SFO1 100.6228299 MHz

CHANNEL F2  
CPDPRG2 waltz16  
NUC2 1H  
PCPD2 80.00 usec  
PL2 0.00 dB  
PL12 17.00 dB  
PL13 17.00 dB  
SFO2 400.1316005 MHz

F2 - Processing parameters  
SI 32768  
SF 100.6127690 MHz  
WDW EM  
SSB 0  
LB 1.00 Hz  
GB 0  
PC 1.40

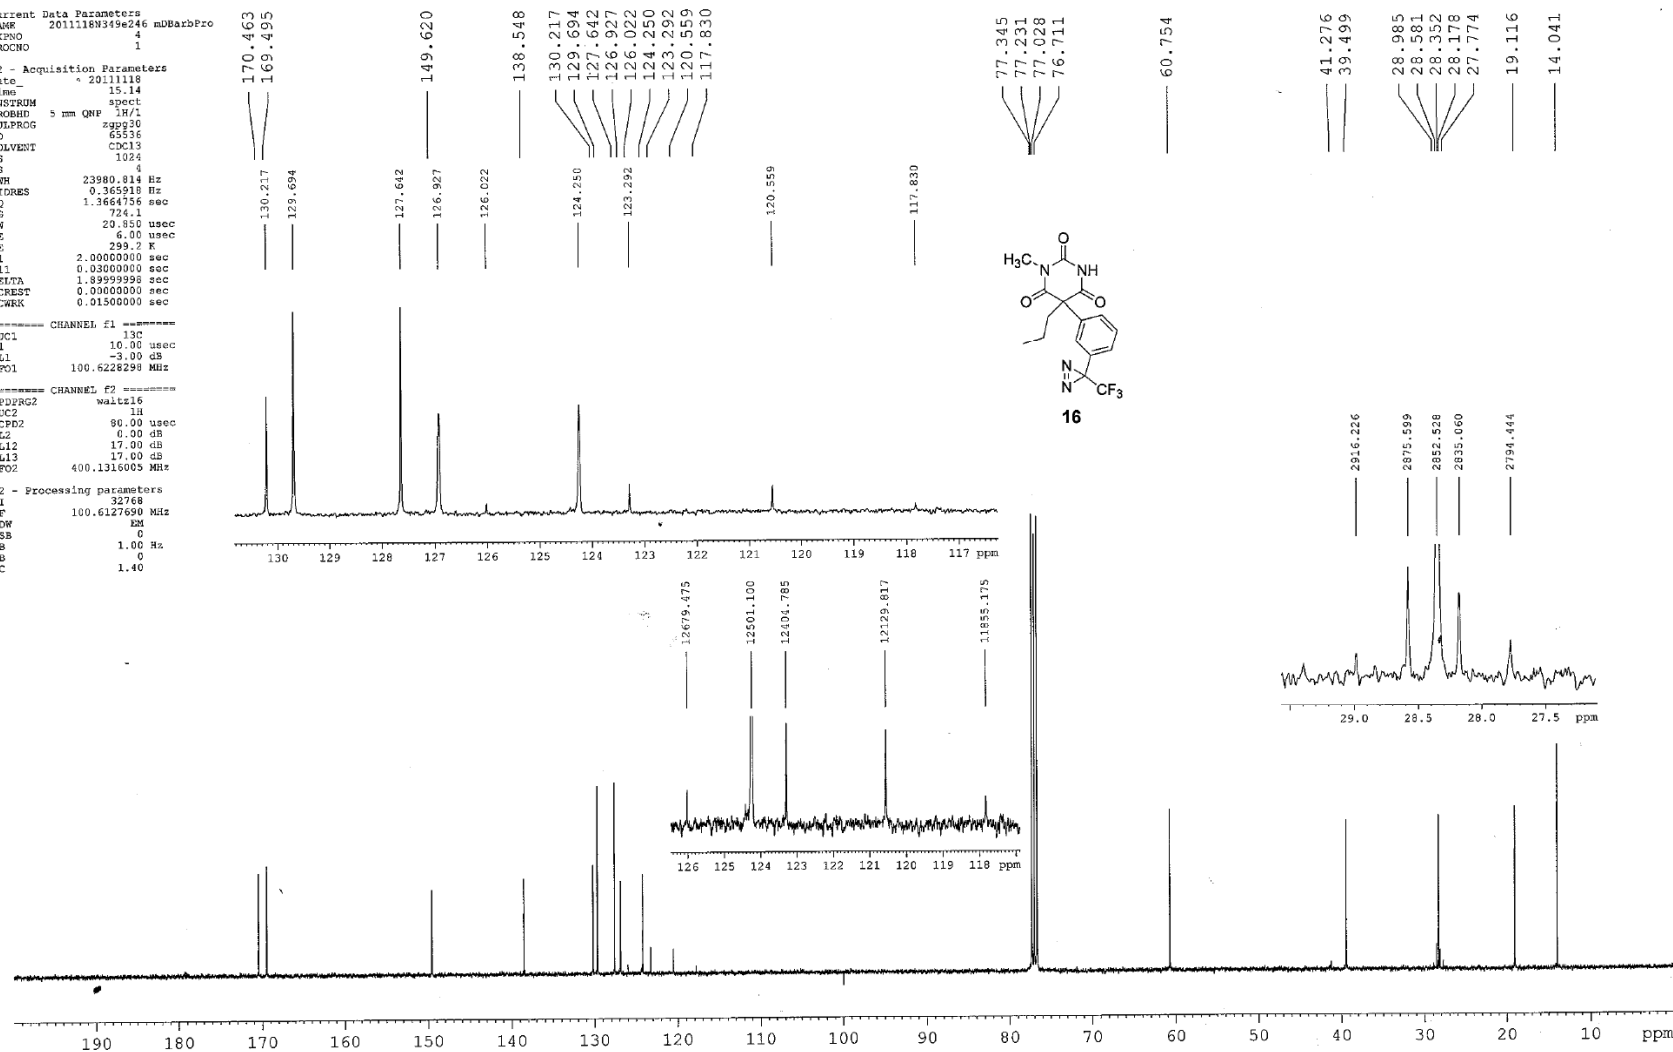



Current Data Parameters  
NAME 2011118349e246 mDBarbPro  
EXPNO 2  
PROCNO 1

F2 - Acquisition Parameters  
Date 20111118  
Time 14.57  
INSTRUM spect  
PROBHD 5 mm QNP 1H/1  
PULPROG zgpg30  
TD 451120  
SOLVENT C6D6  
NS 16  
DS 4  
SWH 75187.969 Hz  
FIDRES 0.166670 Hz  
AQ 2.9999981 sec  
RG 645.1  
DW 6.650 usec  
DE 6.00 usec  
TE 299.2 K  
D1 1.0000000 sec

===== CHANNEL f1 =====  
NUC1 19F  
P1 12.50 usec  
PL1 -6.00 dB  
SFO1 376.4607044 MHz

F2 - Processing parameters  
SI 65536  
SF 376.4983540 MHz  
WDW EM  
SSB 0  
LB 0.30 Hz  
GB 0  
PC 1.00

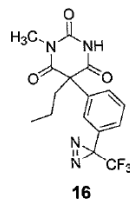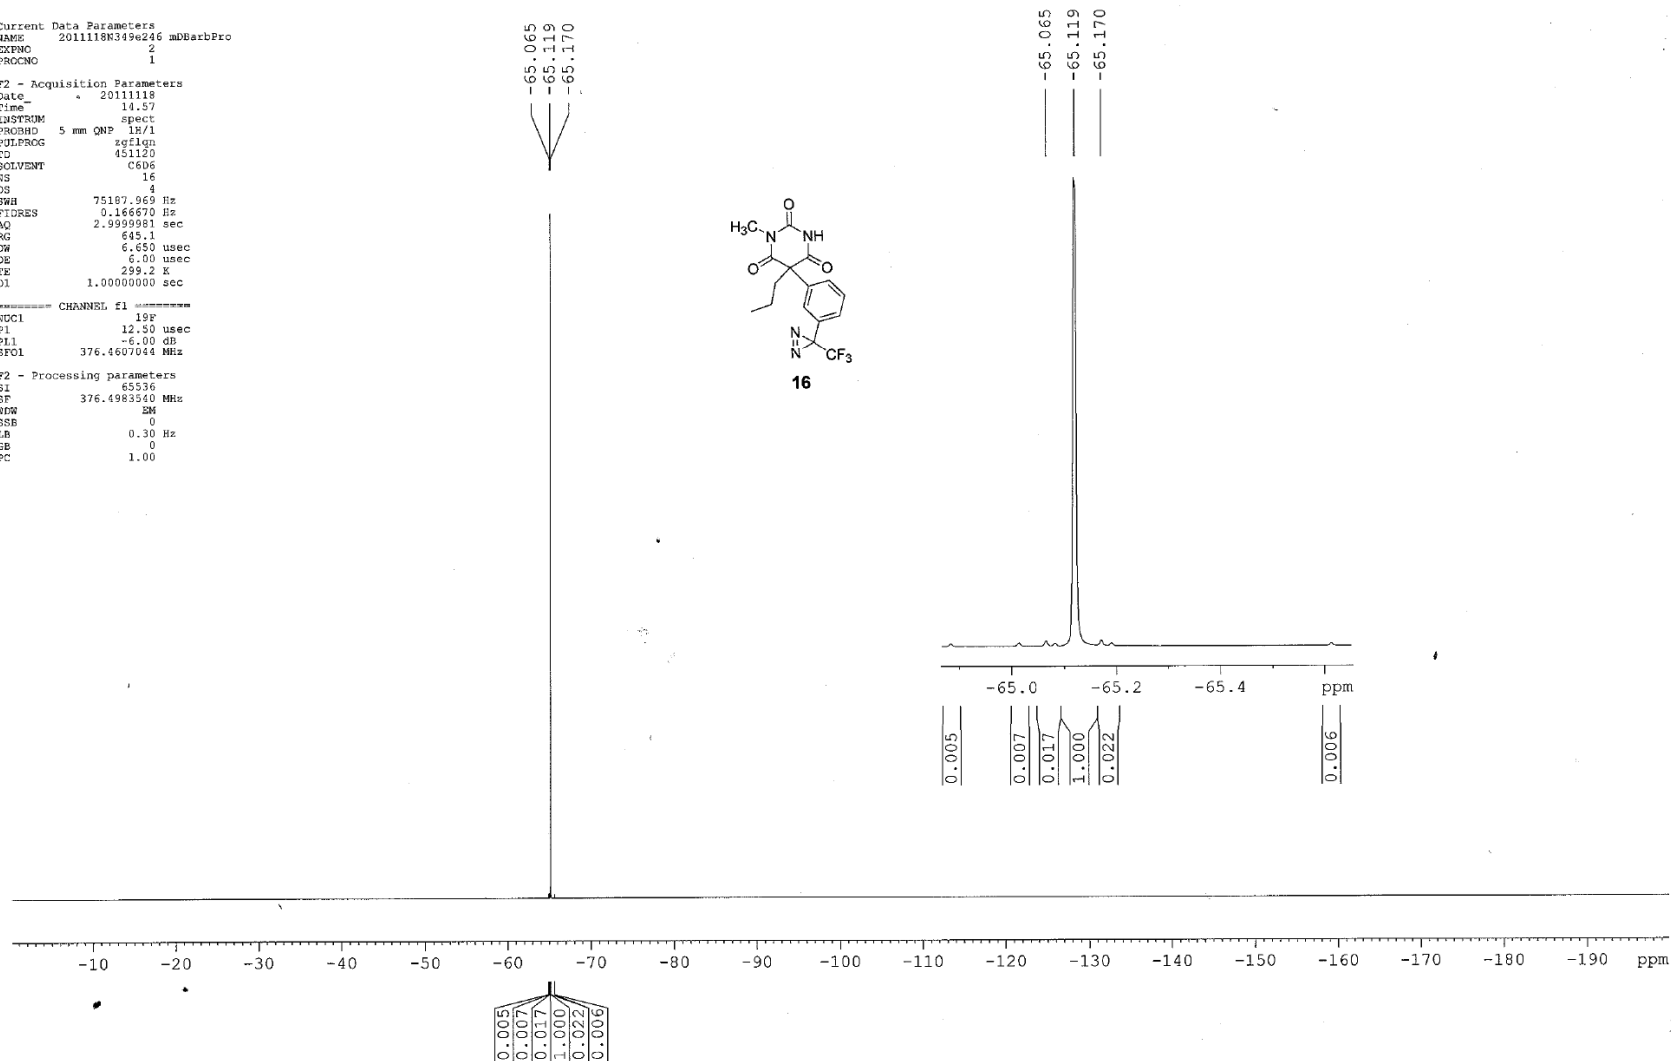

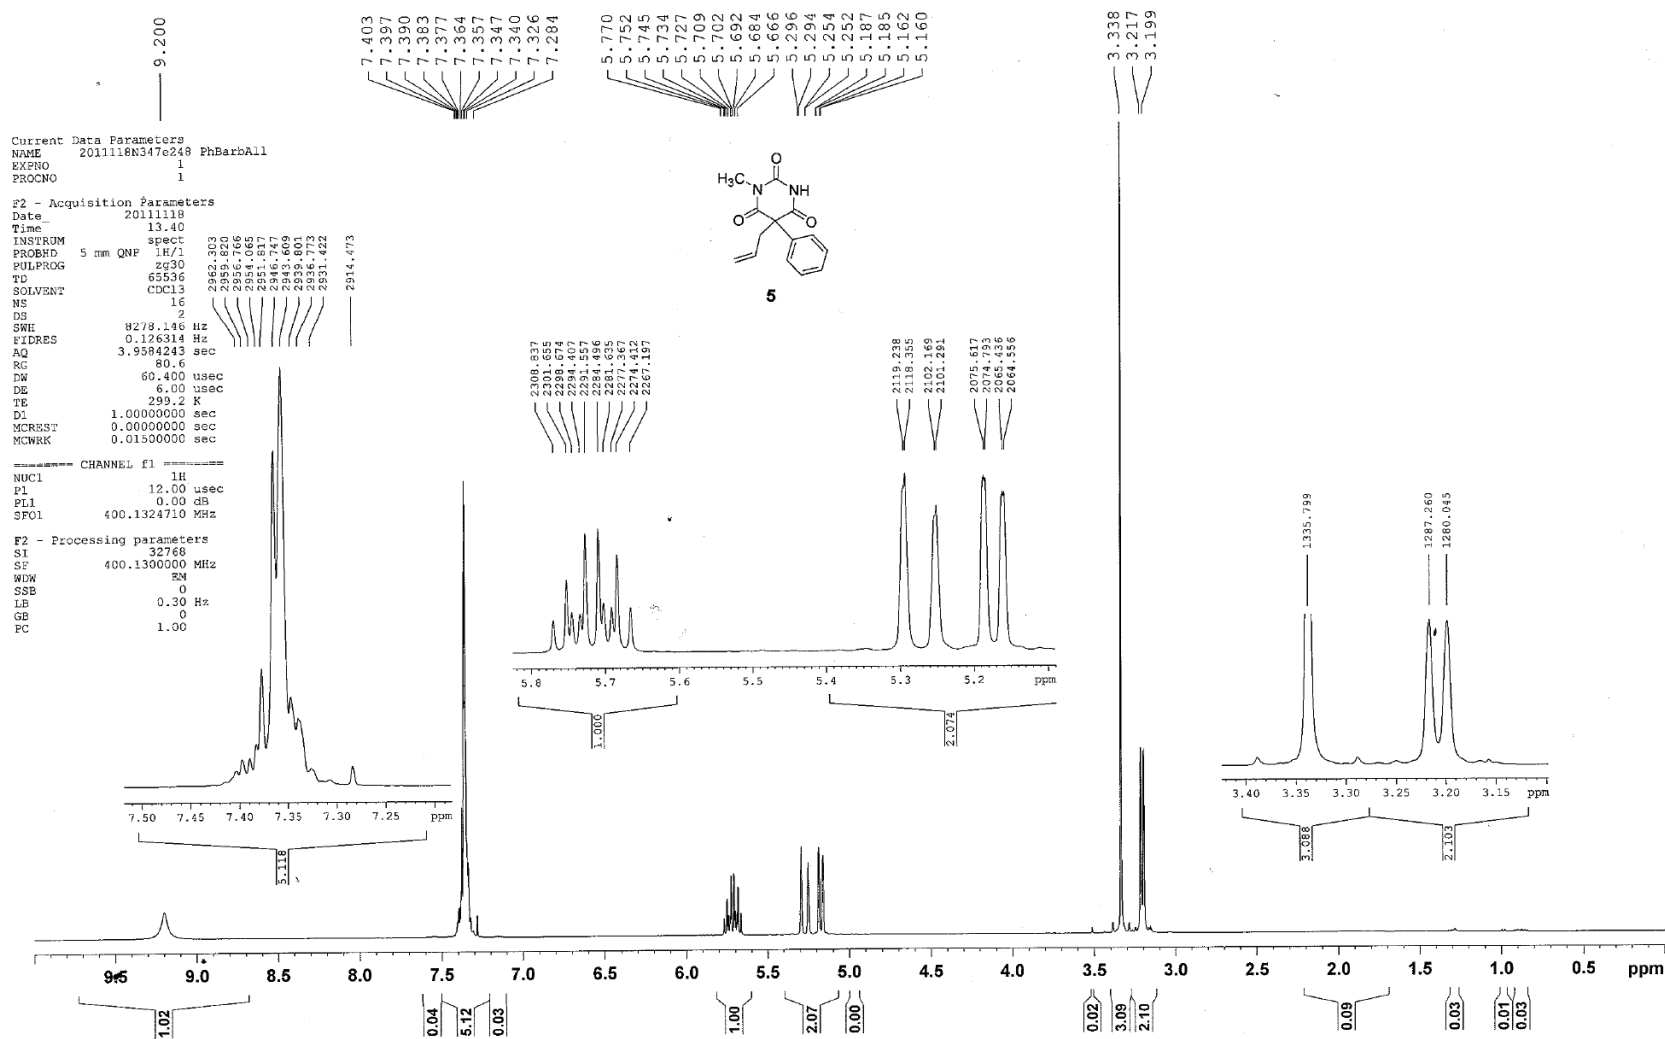

Supplement: Supplementary file 1 [file 4144471]
